# Supplementary material for: Polysubstituted pyrrole derivatives via 1,2-alkenyl migration of novel γ-amino-α,β-unsaturated aldehydes and α-diazocarbonyls
Source: Royal Society of Chemistry journal article supplement (doi:10.1039/c3ra47020b), 2014-01-01
Supplement: c3ra47020b.pdf [file c3ra47020b.pdf]

# Polysubstituted Pyrrole Derivatives *via* 1,2-alkenyl migration of novel $\gamma$ -Amino- $\alpha,\beta$ -Unsaturated Aldehydes and $\alpha$ -Diazocarbonyls

ShutingCai, Jing Zeng, Yongxin Li and Xue-Wei Liu\*

Division of Chemistry and Biological Chemistry, School of Physical and Mathematical  
Sciences,

Nanyang Technological University, Singapore 637371

E-mail: [xuewei@ntu.edu.sg](mailto:xuewei@ntu.edu.sg)

## Supporting Information

### Table of Contents

|                                                                                                                 |       |
|-----------------------------------------------------------------------------------------------------------------|-------|
| General experimental details.....                                                                               | 2     |
| General Synthetic procedure for $\gamma$ -amino- $\alpha,\beta$ -unsaturated aldehyde( <b>S3</b> ) .....        | 3-5   |
| General Synthetic procedure for N-Boc- $\gamma$ -amino- $\alpha,\beta$ -unsaturated aldehyde ( <b>1</b> ) ..... | 6-8   |
| Synthetic procedure for N-Benzyl- $\gamma$ -amino- $\alpha,\beta$ -unsaturated aldehyde ( <b>1I</b> ) .....     | 9     |
| General synthetic procedure for polysubstituted pyrrole derivatives ( <b>3</b> ).....                           | 9     |
| Characterization of polysubstituted pyrrole derivatives( <b>3</b> ) .....                                       | 10-13 |
| Spectral Data for $\gamma$ -amino- $\alpha,\beta$ -unsaturated aldehyde( <b>S3</b> ) .....                      | 14-19 |
| Spectral Data for N-Boc- $\gamma$ -amino- $\alpha,\beta$ -unsaturated aldehyde( <b>1</b> ) .....                | 20-25 |
| Spectral Data for N-Benzyl- $\gamma$ -amino- $\alpha,\beta$ -unsaturated aldehyde ( <b>1I</b> ).....            | 26    |
| Spectral Data for polysubstituted pyrrole derivatives( <b>3</b> ) .....                                         | 27-38 |
| X-Ray Data for Compounds S1f and 3c .....                                                                       | 39-40 |

## General experimental details

All reactions were conducted under an atmosphere of nitrogen, unless otherwise indicated. Anhydrous solvents were transferred *via* oven-dried syringe. Flasks were flame-dried and cooled under a stream of nitrogen. All reagents and solvents were obtained from commercial suppliers (Sigma-Aldrich, Fluka and Alfa Aesar) and used without further purification unless otherwise stated. Evaporation of organic solutions was achieved by rotary evaporation with a water bath temperature below 40 °C. Product purification by flash column chromatography was accomplished using silica gel 60 (0.010- 0.063 mm). Technical grade solvents were used for chromatography and distilled prior to use. Chromatograms were visualized by fluorescence quenching with UV light at 254 nm or by staining using a basic solution of potassium permanganate. IR spectra were recorded using FTIR Restige-21 (Shimadzu) and reported in  $\text{cm}^{-1}$ . High-resolution mass spectra (HRMS) were obtained on a Finnigan/MAT LCQ quadrupole ion trap mass spectrometer, coupled with the TSP4000 HPLC system and the Crystal 310 CE system. Accurate masses are reported for the molecular ion  $[\text{M}+\text{H}]^+$  or a suitable fragment ion. NMR spectra were recorded at room temperature on a 400 MHz Bruker ACF 400 NMR spectrometer. The residual solvent signals were taken as the reference (7.26 ppm for  $^1\text{H}$  NMR spectroscopy and 77.0 ppm for  $^{13}\text{C}$  NMR spectroscopy). Chemical shifts are reported in delta ( $\delta$ ) units, parts per million (ppm) downfield from triethylsilane. Chemical shift ( $\delta$ ) is referred in terms of ppm, coupling constants ( $J$ ) are given in Hz. Following abbreviations classify the multiplicity: s = singlet, d = doublet, t = triplet, q = quartet, qt = quintet, m = multiplet or unresolved. X-ray crystallographic data was collected by using a Bruker X8Apex diffractometer with Mo  $\text{K}/\alpha$  radiation (graphite monochromator). Compound numbers used in the experimental section correspond to those employed in the main paper.

## General Synthetic procedure for the preparation of starting material, $\gamma$ -amino- $\alpha,\beta$ -unsaturated aldehyde(S3)

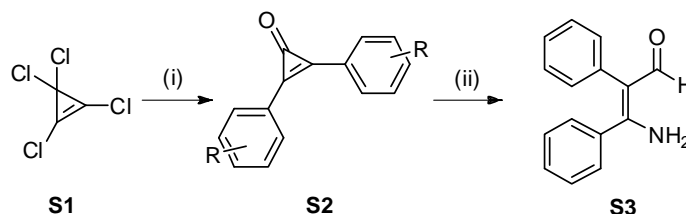

### Procedure (i):

To a suspension of tetrachlorocyclopropene (0.07 mL, 0.64 mmol, 1.0 equiv) and anhydrous  $\text{AlCl}_3$  (180 mg, 1.35 mmol, 1.05 equiv) in  $\text{CH}_2\text{Cl}_2$  (10 mL) was added dropwise, a solution of benzene (0.11 mL, 1.28 mmol, 2.0 equiv) in  $\text{CH}_2\text{Cl}_2$  (1 mL) at  $-78^\circ\text{C}$ . The mixture was stirred for 2 h then warm up to r.t and stirred for another 2 h (TLC monitored). The resulting mixture was quenched with water, diluted with  $\text{CH}_2\text{Cl}_2$ , washed with water ( $2 \times 50$  mL) and brine ( $2 \times 50$  mL). The organic layers were dried over  $\text{Na}_2\text{SO}_4$ , filtered and concentrated under reduced pressure to yield the crude residue as a orange oil. The crude residue was then purified by flash column chromatography on silica gel (20% EtOAc in hexanes) to afford diarylcyclopropenone **S2a** (224 mg, 1.09 mmol, 85% yield) as a yellow solid.<sup>1</sup>

### Procedure (ii):

To a suspension of diarylcyclopropenone **S2a** (100 mg, 0.49 mmol) in  $\text{Et}_2\text{O}$  at  $-78^\circ\text{C}$  was added liquid ammonia. The suspension was then allowed to stir for 3 h at  $-40^\circ\text{C}$ . After completion of the reaction, the cooling bath was removed and the mixture was concentrated under reduced pressure to yield the crude residue as a brown oil. The crude residue was then purified by flash column chromatography on silica gel (20% EtOAc in hexanes) to afford  $\gamma$ -amino- $\alpha,\beta$ -unsaturated aldehyde **S3a** (100 mg, 0.45 mmol, 92% yield) as a yellow solid.

### 2-Aminobenzaldehyde (**S3a**):

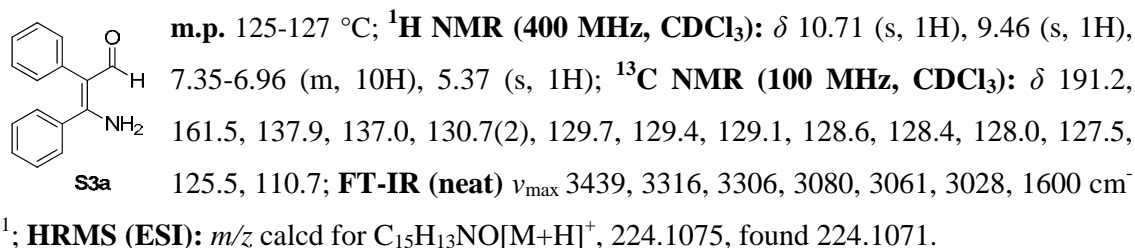

2-Aminobenzaldehyde (S3b):

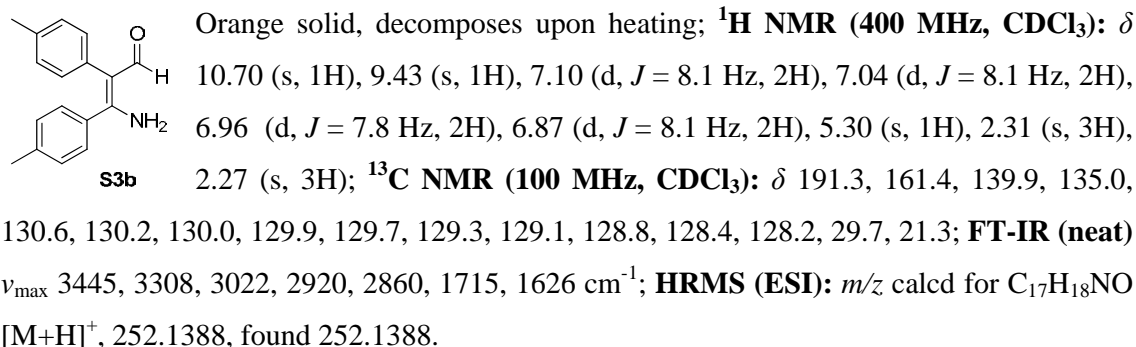

2-Aminobenzaldehyde (S3c):

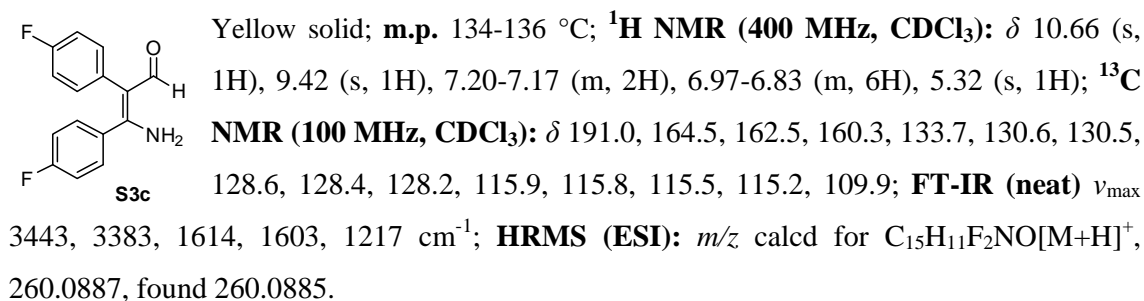

2-Aminobenzaldehyde (S3d):

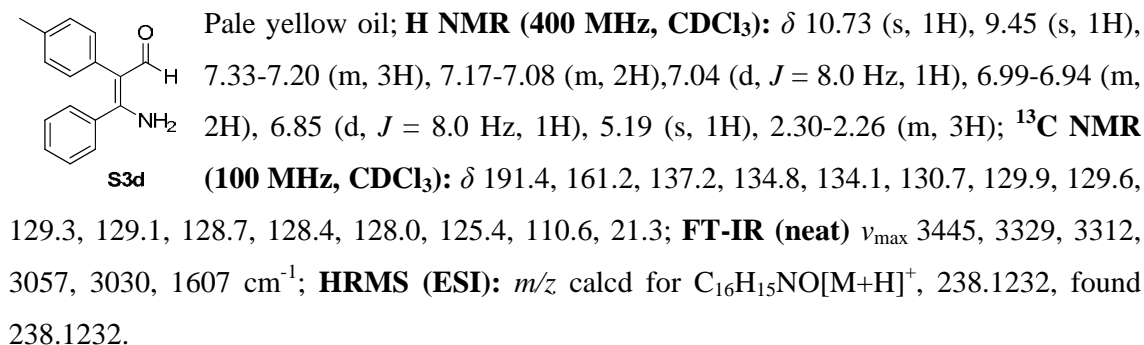

2-Aminobenzaldehyde (S3e):

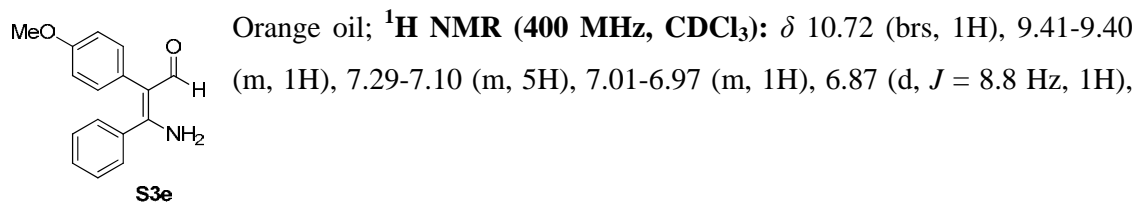

6.73 (d,  $J = 8.8$  Hz, 1H), 6.68 (d,  $J = 8.8$  Hz, 1H), 3.76-3.73 (m, 3H);  **$^{13}\text{C}$  NMR (100 MHz,  $\text{CDCl}_3$ )**:  $\delta$  191.3, 161.5, 157.6, 138.3, 131.8, 130.7, 130.0, 129.5, 129.1, 128.6, 128.4, 128.0, 125.3, 113.7, 110.1, 55.2; **FT-IR (neat)**  $\nu_{\text{max}}$  3445, 3312, 3167, 3156, 3078, 3061, 3005, 1749, 1607  $\text{cm}^{-1}$ ; **HRMS (ESI)**:  $m/z$  calcd for  $\text{C}_{16}\text{H}_{15}\text{NO}_2[\text{M}+\text{H}]^+$ , 254.1181, found 254.1179.

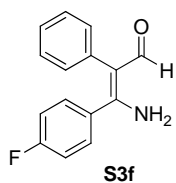

Yellow oil;  **$^1\text{H}$  NMR (400 MHz,  $\text{CDCl}_3$ )**:  $\delta$  10.68 (br s, 1H), 9.46 (s, 1H), 7.58-6.83 (m, 9H), 5.37 (br s, 1H);  **$^{13}\text{C}$  NMR (100 MHz,  $\text{CDCl}_3$ )**:  $\delta$  191.3, 161.4, 137.9, 137.1, 130.7(2), 130.6, 129.8, 129.7, 129.3, 129.1, 128.6, 128.5, 128.4, 128.1, 128.0(2), 125.5, 114.8; **FT-IR (neat)**  $\nu_{\text{max}}$  3445, 3389, 3055, 1732, 1661, 1148  $\text{cm}^{-1}$ ; **HRMS (ESI)**:  $m/z$  calcd for  $\text{C}_{15}\text{H}_{13}\text{FNO} [\text{M}+\text{H}]^+$ , 242.0981, found 242.0978.

- 
1. a) G. Kuzmanich, M. N. Gard, M. A. Garcia-Garibay, *J. Am. Chem. Soc.* **2009**, *131*, 11606-11614; b) A. Poloukhine, V. V. Popik, *J. Org. Chem.* **2003**, *68*, 7833-7840; b) R. West, D. C. Zecher, S. W. Tobey, *J. Am. Chem. Soc.* **1970**, *92*, 168-172.

## General Synthetic procedure for the preparation of starting material, N-Boc- $\gamma$ -amino- $\alpha,\beta$ -unsaturated aldehyde(**1**)

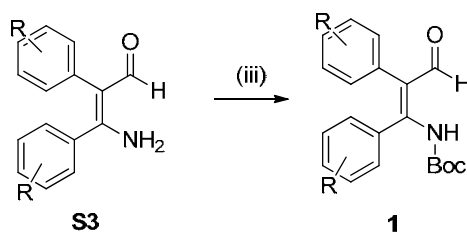

### Procedure (iii):

To a solution of  $\gamma$ -amino- $\alpha,\beta$ -unsaturated aldehyde **S3a** (100 mg, 0.45 mmol, 1.0 equiv) in  $\text{CH}_2\text{Cl}_2$  (10 mL) were added DMAP (11 mg, 0.09 mmol, 0.2 equiv) and triethylamine (0.19 mL, 1.35 mmol, 3.0 equiv). The solution was stirred for 15 mins at r.t,  $\text{Boc}_2\text{O}$  (147 mg, 0.67 mmol, 1.5 equiv) was added and then continued to stirred overnight (TLC monitored). The resulting solution was diluted with  $\text{CH}_2\text{Cl}_2$ , washed with water ( $2 \times 50$  mL) and brine ( $2 \times 50$  mL). The organic layers were dried over  $\text{Na}_2\text{SO}_4$ , filtered and concentrated under reduced pressure to yield the crude residue as a orange oil. The crude residue was then purified by flash column chromatography on silica gel (10% EtOAc in hexanes) to afford N-Boc- $\gamma$ -amino- $\alpha,\beta$ -unsaturated aldehyde **1a** (64 mg, 0.20 mmol, 44% yield) as a yellow solid.

### 2-Aminobenzaldehyde (**1a**):

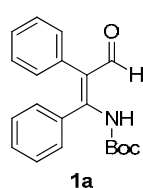

**m.p.** 116-118 °C;  **$^1\text{H}$  NMR (400 MHz,  $\text{CDCl}_3$ ):**  $\delta$  11.58 (s, 1H), 9.60 (s, 1H), 7.49-7.47 (m, 1H), 7.28-7.09 (m, 7H), 6.95-6.93 (m, 2H), 1.36 (s, 9H);  **$^{13}\text{C}$  NMR (100 MHz,  $\text{CDCl}_3$ ):**  $\delta$  193.8, 153.6, 151.5, 136.2, 134.3, 130.8, 130.4, 130.1, 129.2, 129.0, 128.9, 128.4, 128.2, 128.1, 127.6, 126.5, 118.9, 81.8, 27.9; **FT-IR (neat)**  $\nu_{\text{max}}$  3443, 3404, 2978, 2920, 2851, 1732  $\text{cm}^{-1}$ ; **HRMS (ESI):**  $m/z$  calcd for  $\text{C}_{20}\text{H}_{21}\text{NO}_3$   $[\text{M}+\text{H}]^+$ , 324.1600, found 324.1602.

### 2-Aminobenzaldehyde (**1b**):

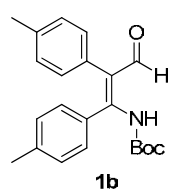

Orange oil;  **$^1\text{H}$  NMR (400 MHz,  $\text{CDCl}_3$ ):**  $\delta$  11.5 (s, 1H), 9.57 (s, 1H), 7.36 (d,  $J$  = 7.5 Hz, 1H), 7.21-7.14 (m, 1H), 6.98 (s, 3H), 6.96 (d,  $J$  = 7.8 Hz, 2H), 6.82 (d,  $J$  = 7.8 Hz, 2H), 2.27 (d,  $J$  = 8.4 Hz, 6H), 1.37 (s, 9H);  **$^{13}\text{C}$  NMR**

(**100 MHz, CDCl<sub>3</sub>**):  $\delta$  194.0, 155.1, 151.6, 140.4, 138.8, 138.2, 136.0, 133.3, 130.6, 130.2, 130.0, 129.9, 128.9, 128.4, 125.6, 118.8, 82.1, 27.9, 27.8, 21.5, 21.1; **FT-IR (neat)**  $\nu_{\max}$  3443, 3387, 3021, 2982, 2851, 1732, 1584 cm<sup>-1</sup>; **HRMS (ESI)**:  $m/z$  calcd for C<sub>22</sub>H<sub>26</sub>NO<sub>3</sub>[M+H]<sup>+</sup>, 352.1913, found 352.1913.

#### 2-Aminobenzaldehyde (**1c**):

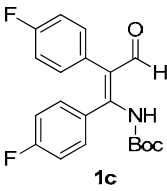 Pale yellow solid; **m.p.** 120-122 °C; **<sup>1</sup>H NMR (400 MHz, CDCl<sub>3</sub>)**:  $\delta$  9.34 (s, 1H), 7.49-7.46 (m, 2H), 7.26-7.16 (m, 6H), 6.56 (s, 1H), 1.28 (s, 6H), 1.24 (s, 3H); **<sup>13</sup>C NMR (100 MHz, CDCl<sub>3</sub>)**:  $\delta$  191.0, 154.1, 150.8, 132.3, 132.0, 131.9, 130.0, 128.2, 125.0, 116.5, 116.3, 115.7, 115.5, 82.6, 27.9, 27.8, 27.7; **FT-IR (neat)**  $\nu_{\max}$  3393, 3331, 3171, 3017, 2978, 1730, 1634, 1601, 1215, 1148 cm<sup>-1</sup>; **HRMS (ESI)**:  $m/z$  calcd for C<sub>25</sub>H<sub>25</sub>F<sub>2</sub>NO<sub>3</sub>[M+H]<sup>+</sup>, 360.1411, found 360.1411.

#### 2-Aminobenzaldehyde (**1d**):

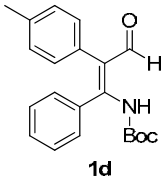 Pale yellow oil; **<sup>1</sup>H NMR (400 MHz, CDCl<sub>3</sub>)**:  $\delta$  11.54 (s, 1H), 9.59 (s, 1H), 7.50-7.35 (m, 2H), 7.20-7.09 (m, 4H), 6.98 (s, 1H), 6.95 (d,  $J$  = 8.0 Hz, 2H), 6.82 (d,  $J$  = 8.0 Hz, 1H), 2.27-2.24 (m, 3H), 1.40-1.36 (m, 9H); **<sup>13</sup>C NMR (100 MHz, CDCl<sub>3</sub>)**:  $\delta$  194.0, 153.2, 138.9, 134.4, 130.8, 130.6, 130.2, 129.7, 129.2, 129.0, 128.7, 128.4, 127.6, 127.2, 126.4, 125.8, 118.8, 81.7, 27.9, 21.3; **FT-IR (neat)**  $\nu_{\max}$  3393, 3017, 2980, 2930, 2855, 1807, 1717, 1653, 1585 cm<sup>-1</sup>; **HRMS (ESI)**:  $m/z$  calcd for C<sub>21</sub>H<sub>23</sub>NO<sub>3</sub>[M+H]<sup>+</sup>, 338.1756, found 338.1756.

#### 2-Aminobenzaldehyde (**1e**):

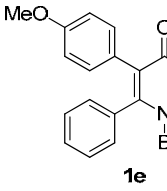 Yellow solid; **m.p.** 79-81 °C; **<sup>1</sup>H NMR (400 MHz, CDCl<sub>3</sub>)**:  $\delta$  11.47 (s, 1H), 9.59-9.58 (m, 1H), 7.47 (s, 1H), 7.21-7.09 (m, 3H), 7.03 (d,  $J$  = 8.5 Hz, 1H), 6.95 (d,  $J$  = 7.3 Hz, 1H), 6.85 (d,  $J$  = 8.5 Hz, 1H), 6.70-6.67 (m, 2H), 3.73 (d,  $J$  = 6.2 Hz, 3H), 1.40 (s, 3H), 1.35 (s, 6H); **<sup>13</sup>C NMR (100 MHz, CDCl<sub>3</sub>)**:  $\delta$  194.0, 158.2, 153.1, 151.6, 131.9, 130.8, 130.1, 128.9, 128.7, 128.2, 127.6, 113.6, 113.1, 81.7, 55.1, 27.9; **FT-IR (neat)**  $\nu_{\max}$  3406, 3389, 3015, 2976, 2959, 2938, 1728, 1634, 1585 cm<sup>-1</sup>; **HRMS (ESI)**:  $m/z$  calcd for C<sub>21</sub>H<sub>23</sub>NO<sub>4</sub>[M+H]<sup>+</sup>, 354.1705, found 354.1705.

2-Aminobenzaldehyde (**1f**):

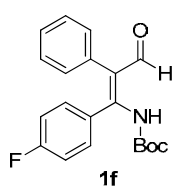

Pale yellow oil; **<sup>1</sup>H NMR (400 MHz, CDCl<sub>3</sub>):**  $\delta$  9.36 (s, 1H), 7.51-7.40 (m, 6H), 7.28-7.18 (m, 3H), 6.63 (s, 1H), 1.27-1.23 (m, 9H); **<sup>13</sup>C NMR (100 MHz, CDCl<sub>3</sub>):**  $\delta$  191.5, 155.0, 132.0, 131.9, 130.4, 130.3, 130.1, 129.3, 129.2, 129.0, 128.9, 128.5, 128.4, 128.2, 115.6, 82.5, 27.7; **FT-IR (neat)**  $\nu_{\max}$  3428, 3387, 2976, 2920, 2849, 1749, 1722, 1684 cm<sup>-1</sup>; **HRMS (ESI):**  $m/z$  calcd for C<sub>20</sub>H<sub>21</sub>FNO<sub>3</sub> [M+H]<sup>+</sup>, 342.1505, found 342.1505.



## General Synthetic procedure for the preparation of starting material, N-Benzyl-γ-amino-α,β-unsaturated aldehyde(**1l**)

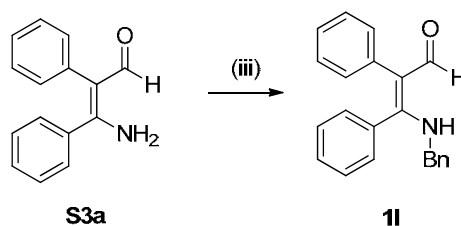

### Procedure (iii):

To a solution of γ-amino-α,β-unsaturated aldehyde **S3a** (100 mg, 0.45 mmol, 1.0 equiv) in DMF (10 mL) was added NaH (16 mg, 0.67 mmol, 1.5 equiv). The solution was stirred for 15 mins at r.t, benzyl bromide (116 mg, 0.67 mmol, 1.5 equiv) was added and then continued to stirred overnight (TLC monitored). The resulting solution was diluted with ether, washed with water (2 × 50 mL) and brine (2 × 50 mL). The organic layers were dried over Na<sub>2</sub>SO<sub>4</sub>, filtered and concentrated under reduced pressure to yield the crude residue as a orange oil. The crude residue was then purified by flash column chromatography on silica gel (10% EtOAc in hexanes) to afford N-Benzyl-γ-amino-α,β-unsaturated aldehyde **1l** (47 mg, 0.15 mmol, 33% yield) as a yellow oil.

### N-Bn2-Aminobenzaldehyde (**1l**):

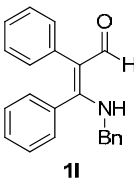 **1l**

<sup>1</sup>H NMR (400 MHz, CDCl<sub>3</sub>): δ 12.13 (s, 1H), 9.37 (s, 1H), 7.37-7.21 (m, 5H), 7.12-7.03 (m, 3H), 6.95-6.93 (m, 2H), 4.36 (d, *J* = 6.4 Hz, 2H); <sup>13</sup>C NMR (100 MHz, CDCl<sub>3</sub>): δ 193.8, 153.6, 151.5, 136.2, 134.3, 130.8, 130.4, 130.1, 129.2, 129.0, 128.9, 128.4, 128.2, 128.1, 127.6, 126.5, 118.9, 81.8, 27.9; FT-IR (neat) ν<sub>max</sub> 3421, 3400, 2975, 2935, 2851, 1732 cm<sup>-1</sup>; HRMS (ESI): *m/z* calcd for C<sub>20</sub>H<sub>21</sub>NO<sub>3</sub>[M+H]<sup>+</sup>, 324.1600, found 324.1602.

## General Synthetic procedure for the synthesis of polysubstituted pyrrole derivatives(3)

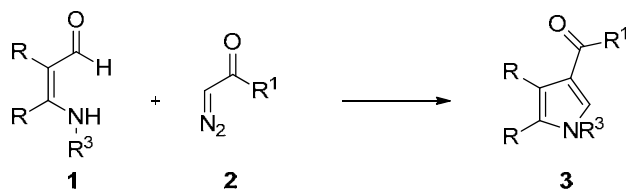

To a solution of N-Boc- $\gamma$ -amino- $\alpha,\beta$ -unsaturated aldehyde **1a** (20 mg, 0.06 mmol, 1.0 equiv) in CH<sub>2</sub>Cl<sub>2</sub> (10 mL) were added ethyl diazoacetate **2a** (0.02 mL, 0.19 mmol, 3.0 equiv) and TiCl<sub>4</sub> (1 M in CH<sub>2</sub>Cl<sub>2</sub>, 0.01 mL, 0.01 mmol, 0.2 equiv) at r.t. The suspension was then stirred at reflux for 6 h (TLC monitored). The resulting mixture was diluted with CH<sub>2</sub>Cl<sub>2</sub>, washed with water (2  $\times$  20 mL) and brine (2  $\times$  20 mL). The organic layers were dried over Na<sub>2</sub>SO<sub>4</sub>, filtered and concentrated under reduced pressure to yield the crude residue as a brown oil. The crude residue was then purified by flash column chromatography on silica gel (5% EtOAc in hexanes) to afford polysubstituted pyrrole derivative **3a** (18 mg, 0.05 mmol, 78% yield) as a yellow oil.

### Pyrrole (**3a**):

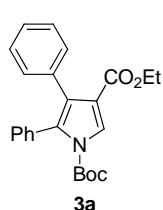

**<sup>1</sup>H NMR (400 MHz, CDCl<sub>3</sub>):**  $\delta$  8.04 (s, 1H), 7.22-7.21 (m, 3H), 7.17-7.09 (m, 7H), 4.16 (q,  $J$  = 7.1 Hz, 2H), 1.30 (s, 9H), 1.17 (t,  $J$  = 7.1 Hz, 3H); **<sup>13</sup>C NMR (100 MHz, CDCl<sub>3</sub>):**  $\delta$  163.9, 148.6, 133.5, 132.5, 132.4, 130.8, 130.7, 127.5, 127.2, 127.0, 126.5, 117.0, 84.8, 59.9, 27.4, 14.1; **FT-IR (neat)**  $\nu_{\max}$  3055, 1749, 1647, 1558, 1362, 1219 cm<sup>-1</sup>; **HRMS (ESI):**  $m/z$  calcd for C<sub>24</sub>H<sub>25</sub>NO<sub>4</sub>[M+H]<sup>+</sup>, 392.1862, found 392.1854.

### Pyrrole (**3b**):

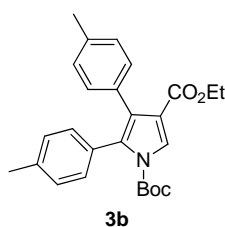

Yellow solid, decomposes upon heating; **<sup>1</sup>H NMR (400 MHz, CDCl<sub>3</sub>):**  $\delta$  8.00 (s, 1H), 7.00 (d,  $J$  = 12.5 Hz, 8H), 4.17 (q,  $J$  = 7.1 Hz, 2H), 2.29 (s, 3H), 2.27 (s, 3H), 1.33 (s, 9H), 1.19 (t,  $J$  = 7.1 Hz, 3H); **<sup>13</sup>C NMR (100 MHz, CDCl<sub>3</sub>):**  $\delta$  163.9, 148.7, 137.0, 135.9, 132.4, 130.5(2), 129.5, 128.2, 127.9, 127.2, 126.8, 116.9, 84.6, 59.9, 27.5, 21.3, 21.2,

14.2; **FT-IR** (neat)  $\nu_{\max}$  3584, 3289, 2957, 2922, 2851, 1609  $\text{cm}^{-1}$ ; **HRMS** (ESI):  $m/z$  calcd for  $\text{C}_{26}\text{H}_{29}\text{NO}_4[\text{M}+\text{H}]^+$ , 420.2175, found 420.2179.

#### Pyrrole (3c):

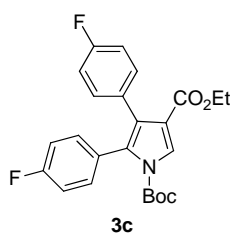

Yellow oil;  **$^1\text{H}$  NMR** (400 MHz,  $\text{CDCl}_3$ ):  $\delta$  8.03 (s, 1H), 7.10-7.03 (m, 4H), 6.96-6.85 (m, 4H), 4.17 (q,  $J = 7.1$  Hz, 2H), 1.35 (s, 9H), 1.19 (t,  $J = 7.1$  Hz, 1H);  **$^{13}\text{C}$  NMR** (100 MHz,  $\text{CDCl}_3$ ):  $\delta$  163.8, 148.4, 133.3, 132.4, 132.2, 131.4, 130.7, 130.6, 129.2, 128.3, 127.6, 127.1, 126.8, 126.7, 116.9, 114.7, 114.6, 114.4, 114.3, 114.2, 85.1, 60.0, 27.4, 14.1;

**FT-IR** (neat)  $\nu_{\max}$  3584, 3406, 3387, 2957, 2934, 2918, 2851, 2806, 1749, 1607, 1595, 1153  $\text{cm}^{-1}$ ; **HRMS** (ESI):  $m/z$  calcd for  $\text{C}_{24}\text{H}_{23}\text{F}_2\text{NO}_4[\text{M}+\text{H}]^+$ , 428.1673, found 428.1673.

#### Pyrrole (3d):

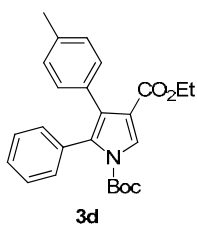

Yellow solid; **m.p.** 96-98  $^{\circ}\text{C}$ ;  **$^1\text{H}$  NMR** (400 MHz,  $\text{CDCl}_3$ ):  $\delta$  8.03-8.02 (m, 1H), 7.23-7.21 (m, 2H), 7.18-7.09 (m, 3H), 7.01-6.98 (m, 4H), 4.17 (d,  $J = 7.2$  Hz, 2H), 2.29-2.26 (m, 3H), 1.34 (s, 3H), 1.29 (s, 6H), 1.22-1.14 (m, 3H);  **$^{13}\text{C}$  NMR** (100 MHz,  $\text{CDCl}_3$ ):  $\delta$  164.0, 148.7, 137.1, 136.0, 132.7, 132.5, 132.2, 130.7, 130.5, 130.4, 129.3, 128.6, 128.2, 127.9, 127.5, 127.1,

126.9, 126.5, 116.9, 84.7, 59.9, 27.4, 21.3, 14.1; **FT-IR** (neat)  $\nu_{\max}$  3019, 2932, 2870, 1748, 1703, 1371, 1360, 1256, 1215  $\text{cm}^{-1}$ ; **HRMS** (ESI):  $m/z$  calcd for  $\text{C}_{25}\text{H}_{27}\text{NO}_4[\text{M}+\text{H}]^+$ , 406.2018, found 406.2005.

#### Pyrrole (3e):

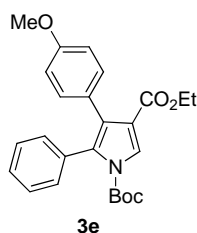

Yellow oil;  **$^1\text{H}$  NMR** (400 MHz,  $\text{CDCl}_3$ ):  $\delta$  8.03-8.02 (m, 1H), 7.23-7.21 (m, 2H), 7.18-7.16 (m, 1H), 7.13-7.09 (m, 2H), 7.05-7.00 (m, 2H), 6.76-6.70 (m, 2H), 4.21-4.13 (m, 2H), 3.76-3.74 (m, 3H), 1.36 (s, 3H), 1.30 (s, 6H), 1.22-1.16 (m, 3H);  **$^{13}\text{C}$  NMR** (100 MHz,  $\text{CDCl}_3$ ):  $\delta$  164.0, 158.7, 148.5, 131.9, 131.7, 130.8, 130.7, 127.5, 127.4, 127.2, 127.0, 113.0, 112.7,

84.7, 59.9, 55.1, 27.5; **FT-IR** (neat)  $\nu_{\max}$  3019, 2978, 2959, 2934, 1742, 1719, 1686  $\text{cm}^{-1}$ ; **HRMS** (ESI):  $m/z$  calcd for  $\text{C}_{25}\text{H}_{27}\text{NO}_5[\text{M}+\text{H}]^+$ , 422.1967, found 422.1964.

### Pyrrole (3f):

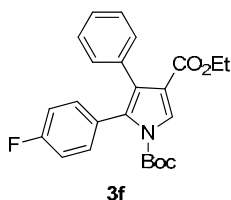

Yellow oil; **<sup>1</sup>H NMR (400 MHz, CDCl<sub>3</sub>)**:  $\delta$  8.04 (s, 1H), 7.22-7.11 (m, 9H), 4.16 (q,  $J$  = 6.8 Hz, 1H), 1.35 (s, 3H), 1.30 (s, 6H), 1.17 (t,  $J$  = 6.8 Hz, 3H); **<sup>13</sup>C NMR (100 MHz, CDCl<sub>3</sub>)**:  $\delta$  163.9, 132.5, 132.4, 130.8, 130.7, 130.6, 127.5, 127.3, 127.2, 127.0, 126.5, 114.5, 84.8, 59.9, 27.5, 14.1; **FT-IR (neat)**  $\nu_{\max}$  3017, 2957, 2918, 2851, 1755, 1722, 1682, 1651, 1213, 1153 cm<sup>-1</sup>; **HRMS (ESI)**:  $m/z$  calcd for C<sub>24</sub>H<sub>24</sub>FNO<sub>4</sub> [M+H]<sup>+</sup>, 409.1595, found 409.1861.

### Pyrrole (3g):

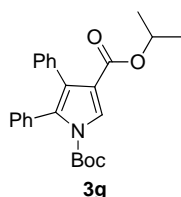

Yellow oil; **<sup>1</sup>H NMR (400 MHz, CDCl<sub>3</sub>)**:  $\delta$  8.03 (s, 1H), 7.23-7.20 (m, 3H), 7.19-7.08 (m, 7H), 5.05 (qt,  $J$  = 6.2 Hz, 1H), 1.30 (s, 9H), 1.14 (d,  $J$  = 6.2 Hz, 6H); **<sup>13</sup>C NMR (100 MHz, CDCl<sub>3</sub>)**:  $\delta$  163.5, 148.7, 133.6, 132.6, 132.3, 130.7(2), 127.5, 127.4, 127.1, 126.9, 126.5, 117.5, 84.7, 67.2, 27.4, 21.7; **FT-IR (neat)**  $\nu_{\max}$  3019, 2976, 2920, 2851, 1749, 1717, 1373, 1215 cm<sup>-1</sup>; **HRMS (ESI)**:  $m/z$  calcd for C<sub>25</sub>H<sub>27</sub>NO<sub>4</sub>[M+H]<sup>+</sup>, 406.2018, found 406.2017.

### Pyrrole (3h):

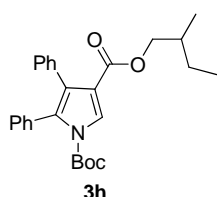

Yellow oil; **<sup>1</sup>H NMR (400 MHz, CDCl<sub>3</sub>)**:  $\delta$  8.06 (s, 1H), 7.21-7.20 (m, 3H), 7.16-7.08 (s, 7H), 4.01-3.89 (m, 2H), 1.56 (m 1H), 1.29 (s, 9H), 1.27 (s, 2H), 0.82 (t,  $J$  = 7.4 Hz, 3H), 0.77 (d,  $J$  = 6.8 Hz, 3H); **<sup>13</sup>C NMR (100 MHz, CDCl<sub>3</sub>)**:  $\delta$  164.2, 148.7, 133.6, 132.5, 132.4, 130.7, 130.6, 127.4, 127.3, 127.2, 127.1, 126.5, 117.1, 84.8, 68.8, 34.0, 27.4, 25.9, 16.3, 11.2; **FT-IR (neat)**  $\nu_{\max}$  3057, 3032, 2963, 2934, 2876, 1748, 1703, 1558, 1522, 1287, 1258, 1213 cm<sup>-1</sup>; **HRMS (ESI)**:  $m/z$  calcd for C<sub>27</sub>H<sub>31</sub>NO<sub>4</sub>[M+H]<sup>+</sup>, 434.2331, found 434.2332.

### Pyrrole (3i):

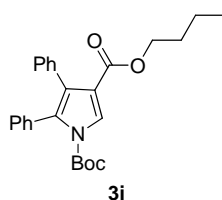

Yellow oil; **<sup>1</sup>H NMR (400 MHz, CDCl<sub>3</sub>)**:  $\delta$  8.05 (s, 1H), 7.22-7.20 (m, 3H), 7.16-7.09 (m, 7H), 4.10 (t,  $J$  = 6.5 Hz, 2H), 1.53-1.46 (m, 2H), 1.30 (s, 9H), 1.26-1.19 (m, 2H), 0.85 (t,  $J$  = 7.4 Hz, 1H); **<sup>13</sup>C NMR (100**

**MHz, CDCl<sub>3</sub>**):  $\delta$  164.1, 148.6, 133.6, 132.5, 132.4, 130.7, 130.6, 127.5, 127.4, 127.2, 127.0, 126.5, 117.0, 84.8, 63.9, 30.6, 27.4, 23.0, 19.1, 13.7; **FT-IR (neat)**  $\nu_{\max}$  2959, 2932, 2872, 1748, 1724, 1705, 1362 cm<sup>-1</sup>; **HRMS (ESI)**:  $m/z$  calcd for C<sub>26</sub>H<sub>29</sub>NO<sub>4</sub>[M+H]<sup>+</sup>, 420.2175, found 420.2191.

#### Pyrrole (3j):

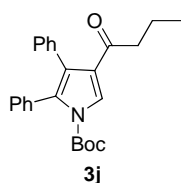

Yellow oil; **<sup>1</sup>H NMR (400 MHz, CDCl<sub>3</sub>)**:  $\delta$  8.00 (s, 1H), 7.22-7.20 (m, 3H), 7.17-7.16 (m, 3H), 7.12-7.07 (m, 4H), 2.58 (t,  $J$  = 7.4 Hz, 2H), 1.68-1.60 (m, 2H), 1.28 (s, 9H), 0.88 (t,  $J$  = 7.4 Hz, 3H); **<sup>13</sup>C NMR (100 MHz, CDCl<sub>3</sub>)**:  $\delta$  196.7, 148.8, 133.8, 132.5, 130.7, 130.58, 127.5(2), 127.4, 126.9, 126.7, 126.2, 125.4, 84.9, 42.6, 35.8, 27.4, 17.8, 13.8; **FT-IR (neat)**  $\nu_{\max}$  3021, 2970, 2920, 2878, 1755, 1668, 1647, 1215, 1152 cm<sup>-1</sup>; **HRMS (ESI)**:  $m/z$  calcd for C<sub>25</sub>H<sub>27</sub>NO<sub>3</sub>[M+H]<sup>+</sup>, 390.2069, found 390.2069.

#### Pyrrole (3k):

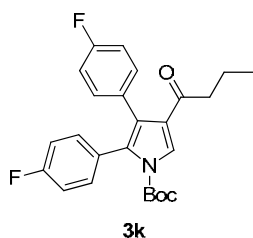

Yellow oil; **<sup>1</sup>H NMR (400 MHz, CDCl<sub>3</sub>)**:  $\delta$  7.38-7.30 (m, 2H), 7.15-7.03 (m, 4H), 6.91 (t,  $J$  = 8.6 Hz, 2H), 2.80 (t,  $J$  = 7.4 Hz, 2H), 1.80 (q,  $J$  = 7.4 Hz, 2H), 1.38 (s, 9H), 1.02 (t,  $J$  = 7.4 Hz, 3H); **<sup>13</sup>C NMR (100 MHz, CDCl<sub>3</sub>)**:  $\delta$  190.0, 149.7, 134.7, 132.7, 131.8, 130.6, 130.0, 129.6, 128.9, 128.3, 128.0, 126.5, 123.6, 117.1, 115.6, 115.4, 115.3, 115.2, 115.1, 85.5, 40.5, 27.2, 18.6, 14.0; **FT-IR (neat)**  $\nu_{\max}$  3019, 2968, 2934, 2878, 2857, 1767, 1761, 1732, 1215 cm<sup>-1</sup>; **HRMS (ESI)**:  $m/z$  calcd for C<sub>25</sub>H<sub>25</sub>F<sub>2</sub>NO<sub>3</sub>[M+H]<sup>+</sup>, 426.1881, found 426.1881.

#### Pyrrole (3l):

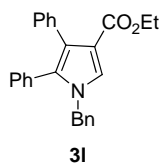

Yellow oil; **<sup>1</sup>H NMR (400 MHz, CDCl<sub>3</sub>)**:  $\delta$  7.34 (s, 1H), 7.33-7.13 (m, 13H), 6.84 (d,  $J$  = 7.0 Hz, 2H), 5.50 (s, 2H), 4.24 (q,  $J$  = 7.1 Hz, 1H), 1.29 (t,  $J$  = 7.1 Hz, 3H); **<sup>13</sup>C NMR (100 MHz, CDCl<sub>3</sub>)**:  $\delta$  161.1, 139.1, 138.0, 135.1, 131.6, 131.0, 128.6, 128.3, 128.1, 127.7, 126.8, 125.8, 125.7, 123.5, 122.5, 117.7, 60.0, 49.0, 29.7, 14.4; **FT-IR (neat)**  $\nu_{\max}$  3019, 2976, 2920, 2899, 1749, 1722, 1215 cm<sup>-1</sup>; **HRMS (ESI)**:  $m/z$  calcd for C<sub>26</sub>H<sub>23</sub>NO<sub>2</sub>[M+H]<sup>+</sup>, 382.1807, found 382.1809.

# <sup>1</sup>H and <sup>13</sup>C NMR spectra of 2-Aminoaldehyde (S3)

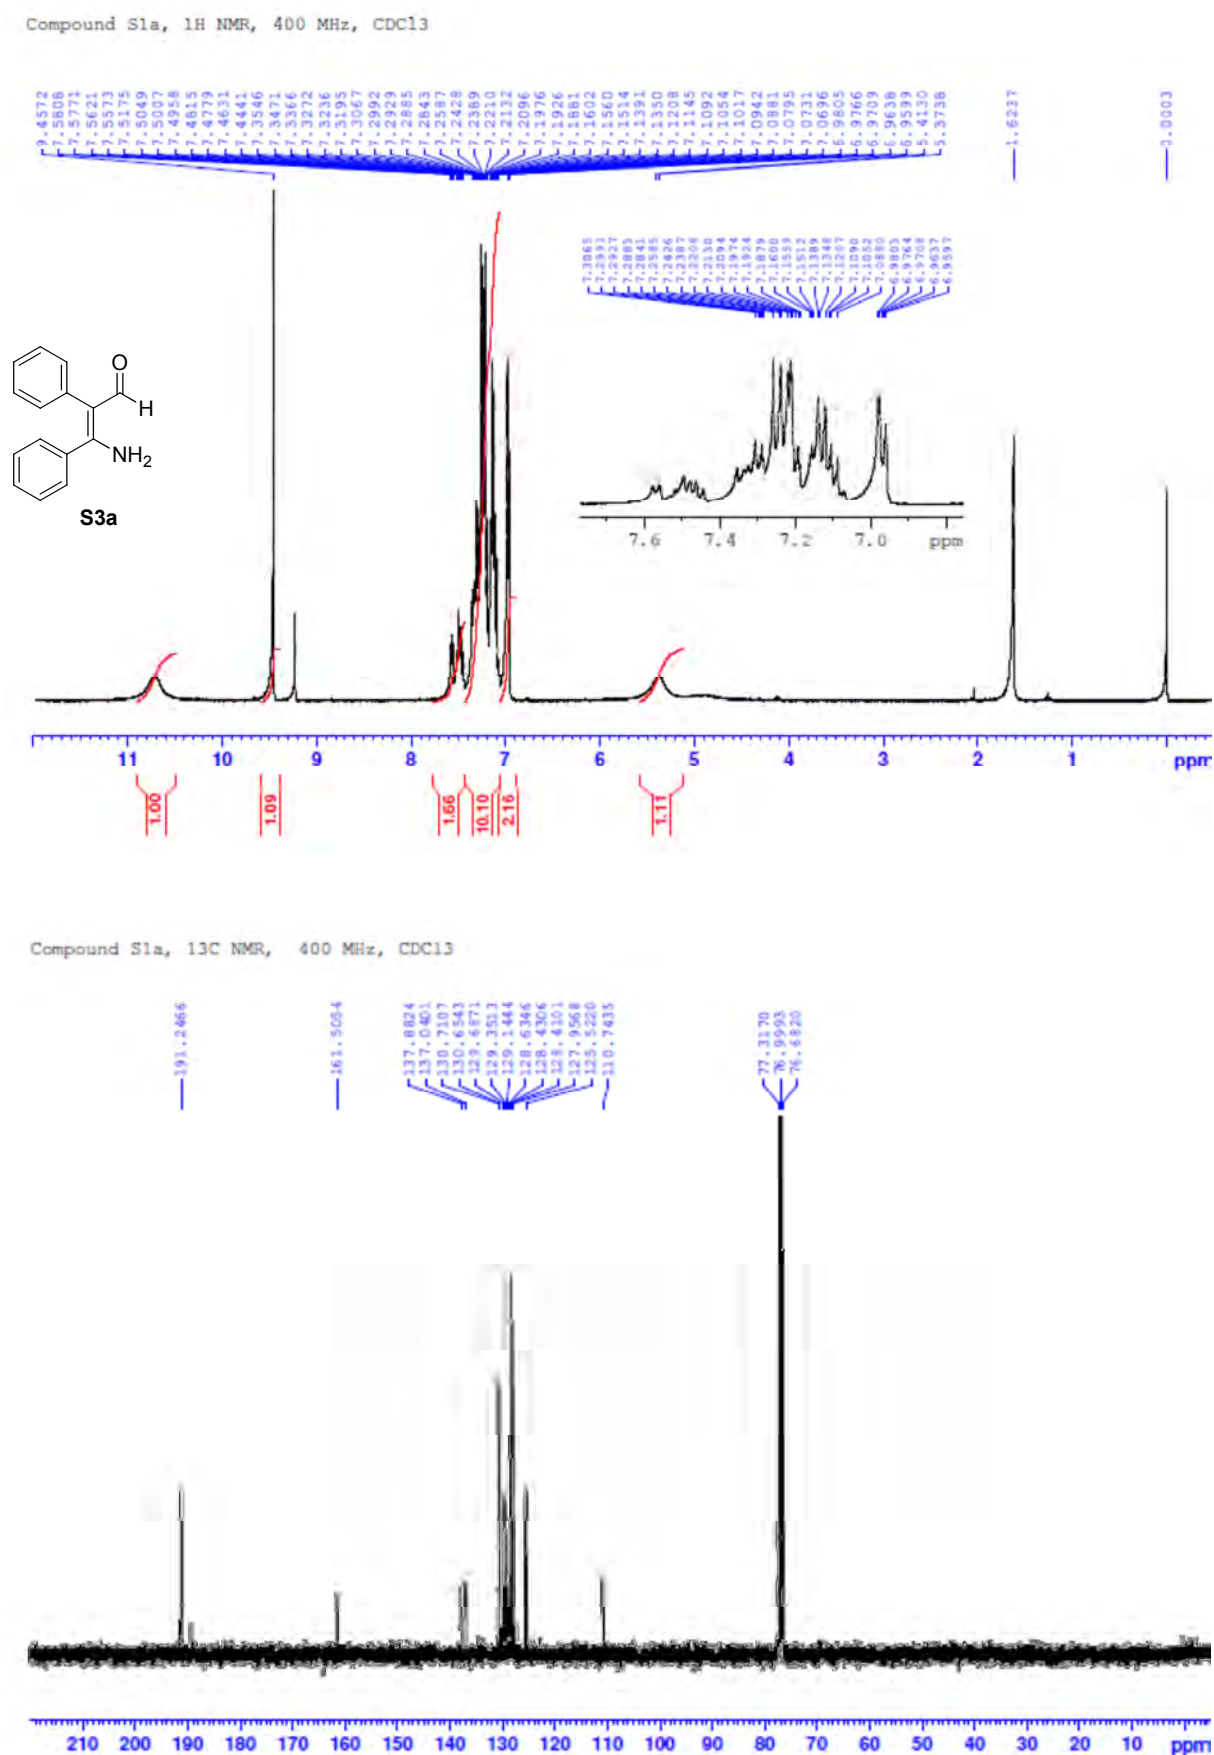

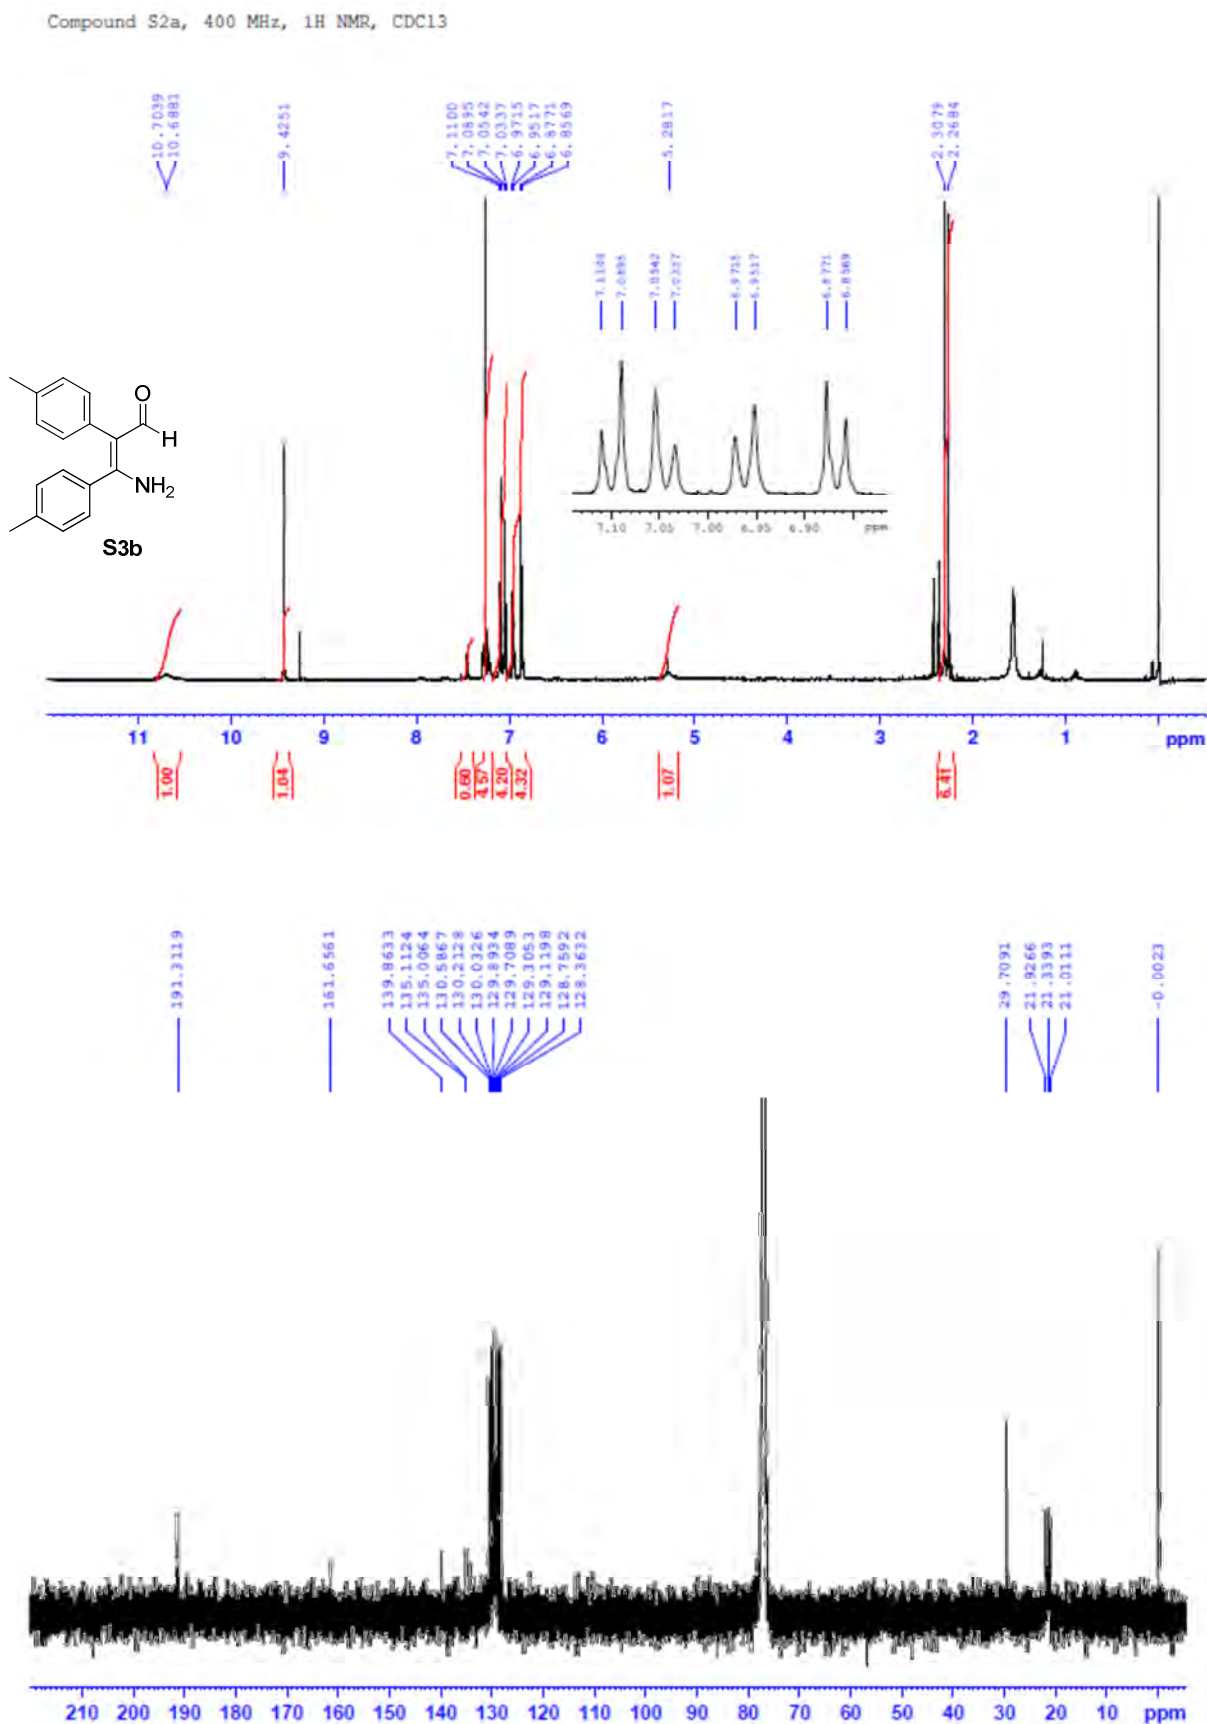



Compound S1c, 400 MHz, <sup>1</sup>H NMR, CDCl<sub>3</sub>

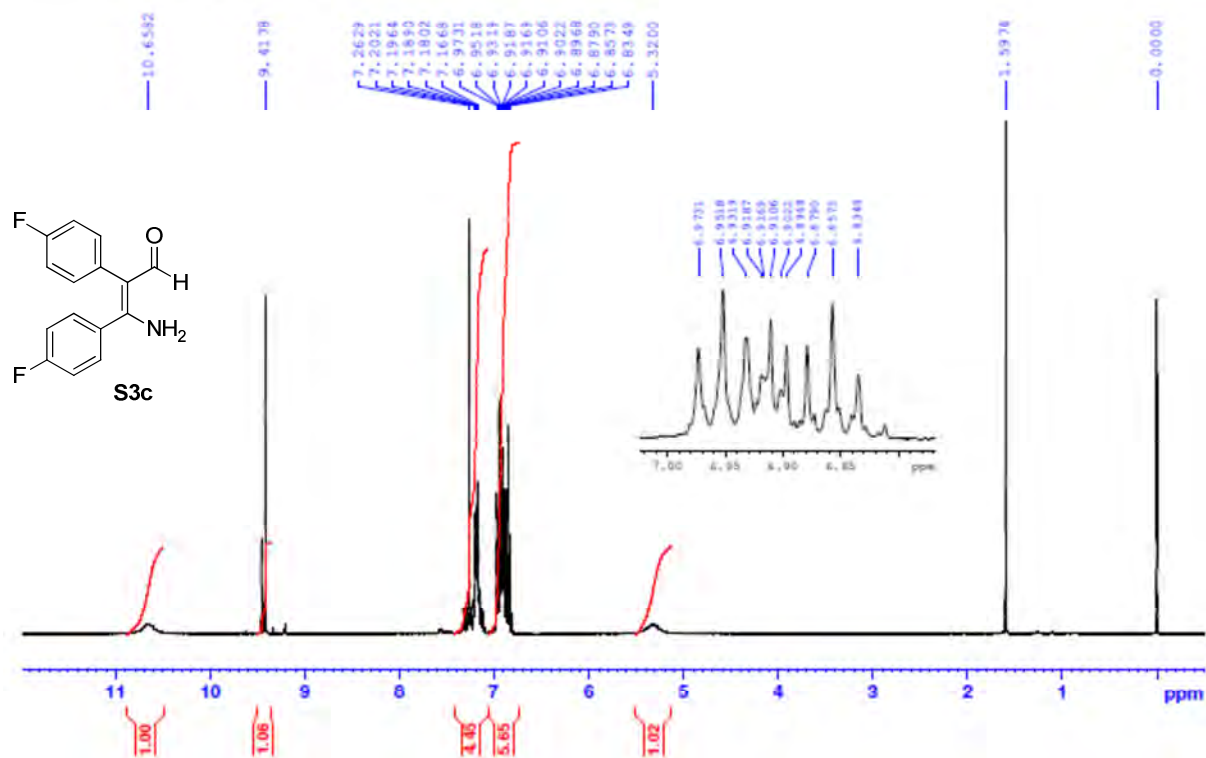

Compound S1c, 400 MHz, <sup>13</sup>C NMR, CDCl<sub>3</sub>

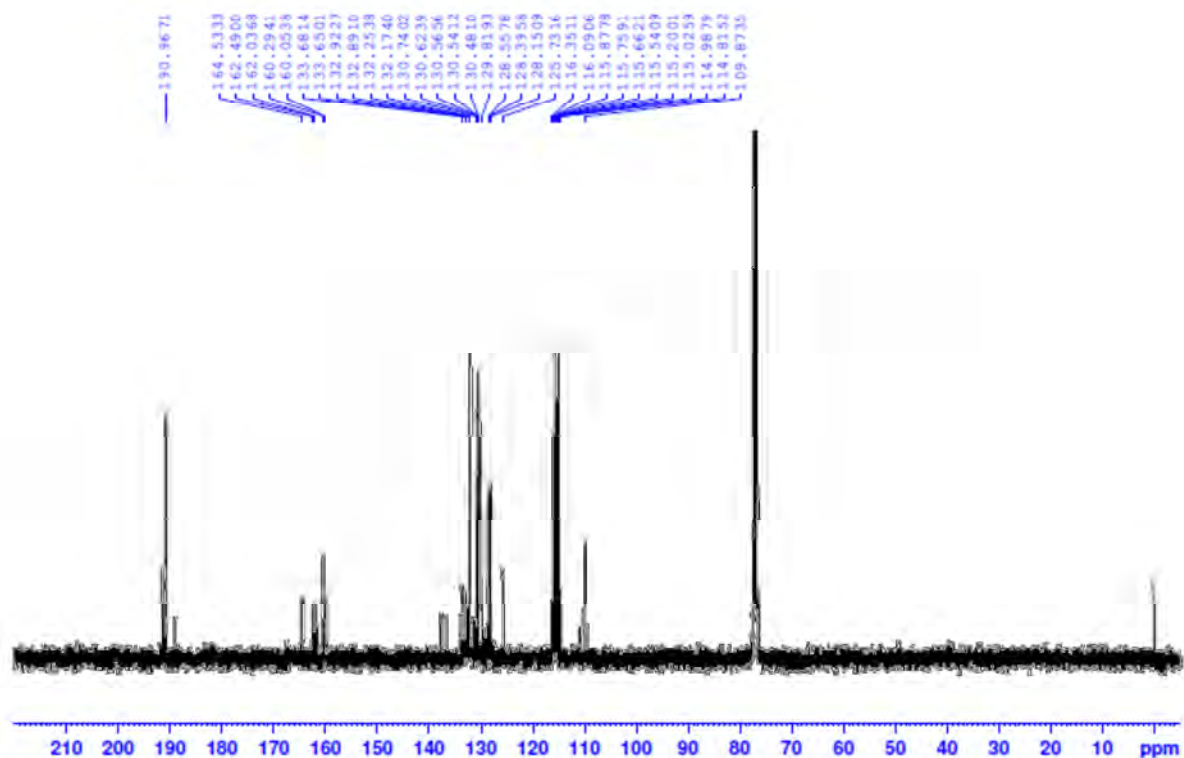



Compound S1d, <sup>1</sup>H NMR, 400 MHz, CDCl<sub>3</sub>

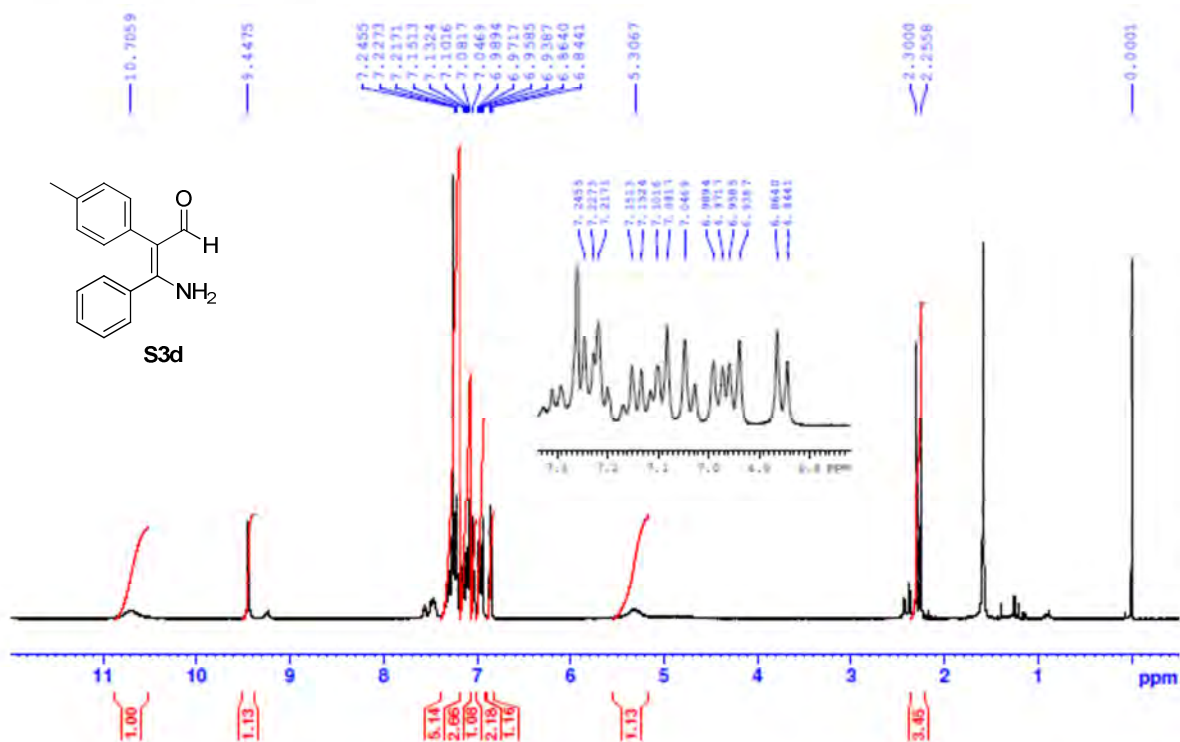

Compound S1d, <sup>13</sup>C NMR, 400 MHz, CDCl<sub>3</sub>

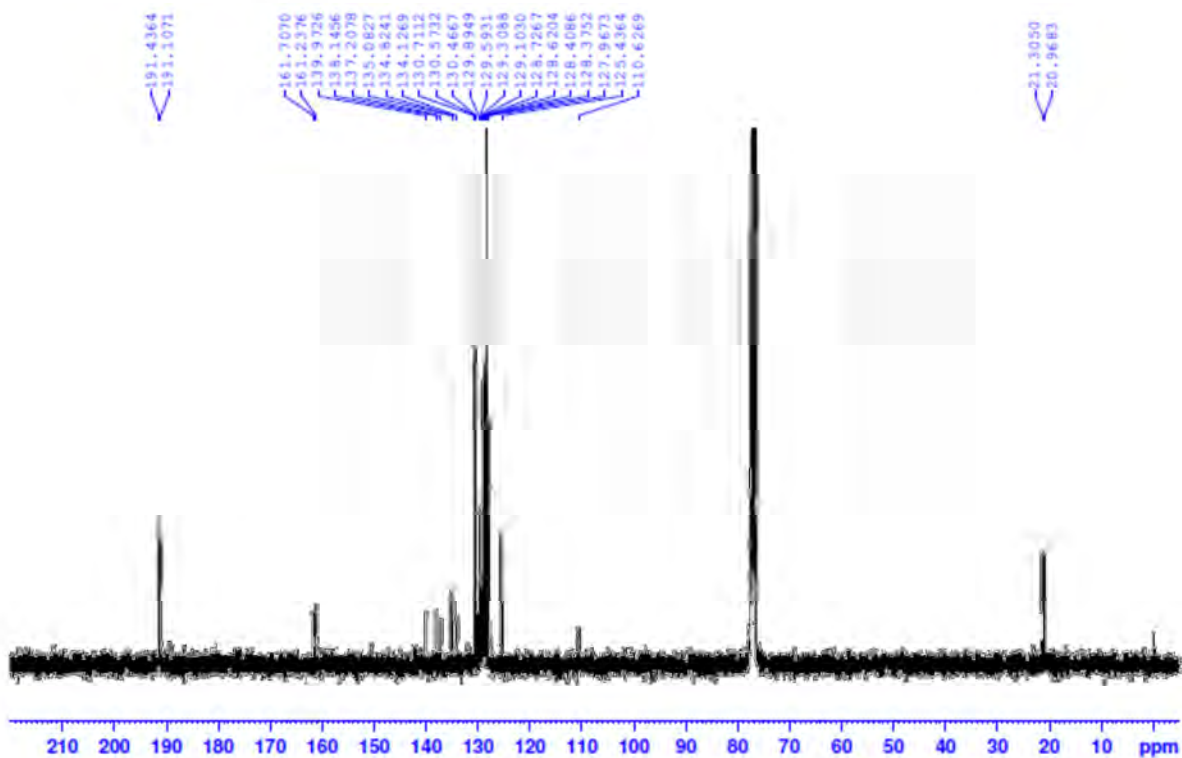

Compound S3e, 400MHz, 1H NMR, CDC13

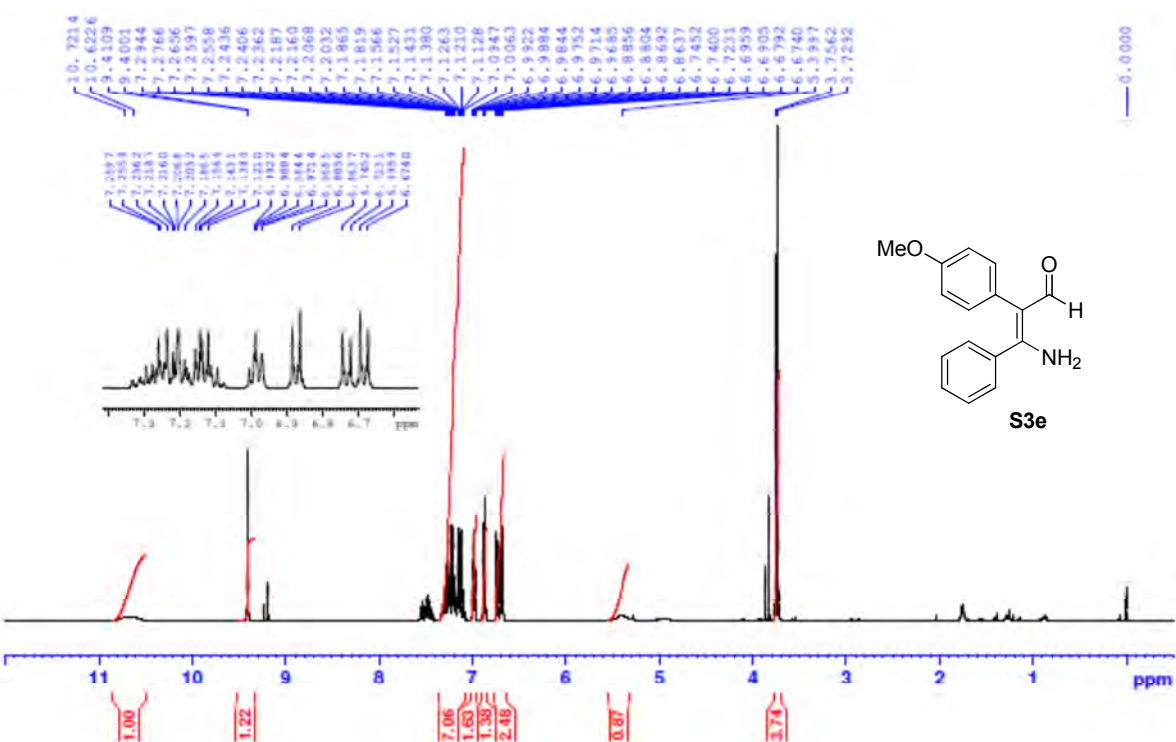

Compound S3e, 400MHz, 13C NMR, CDC13

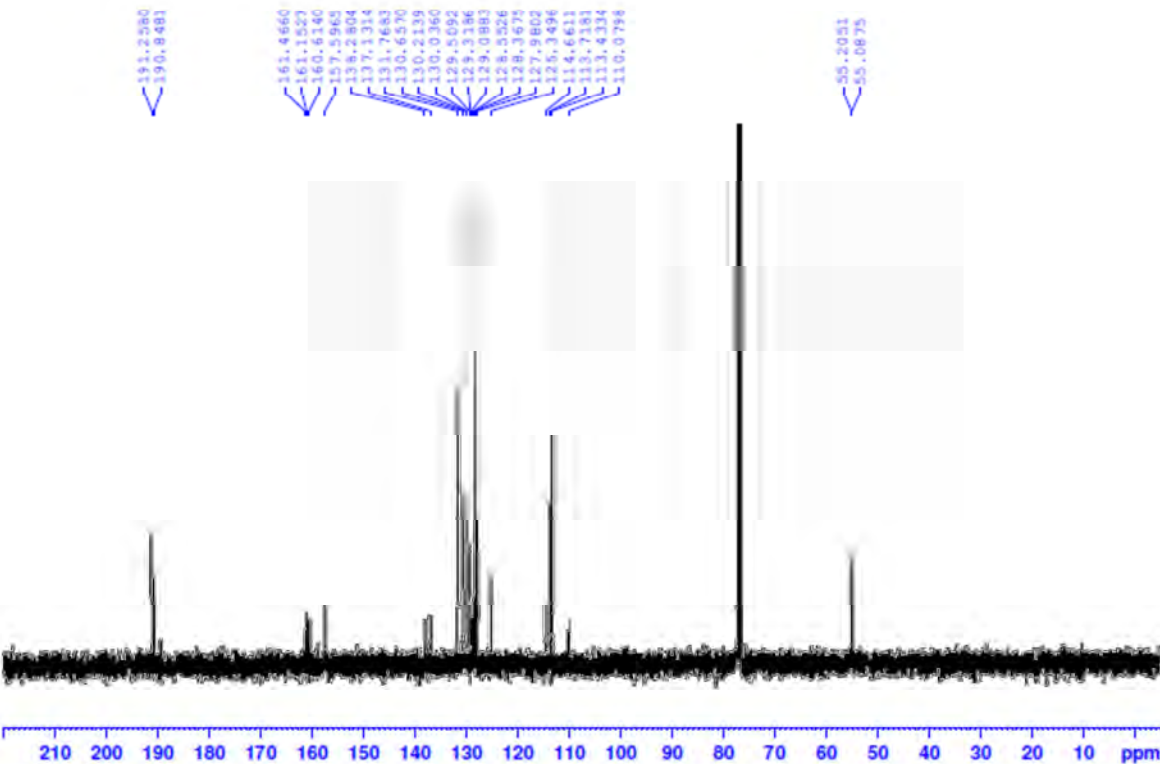



# <sup>1</sup>H and <sup>13</sup>C NMR spectra of N-Boc-γ-amino-α,β-unsaturated aldehyde (1)

Compound 1a, 400 MHz, <sup>1</sup>H NMR, CDCl<sub>3</sub>

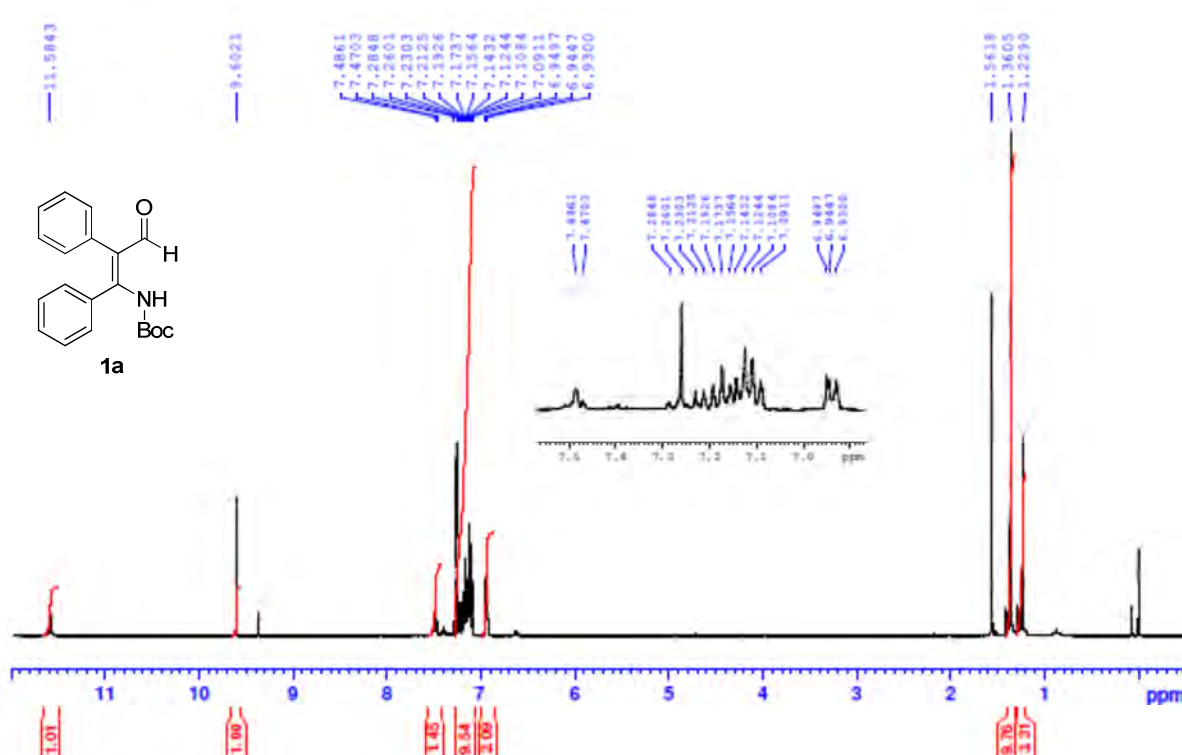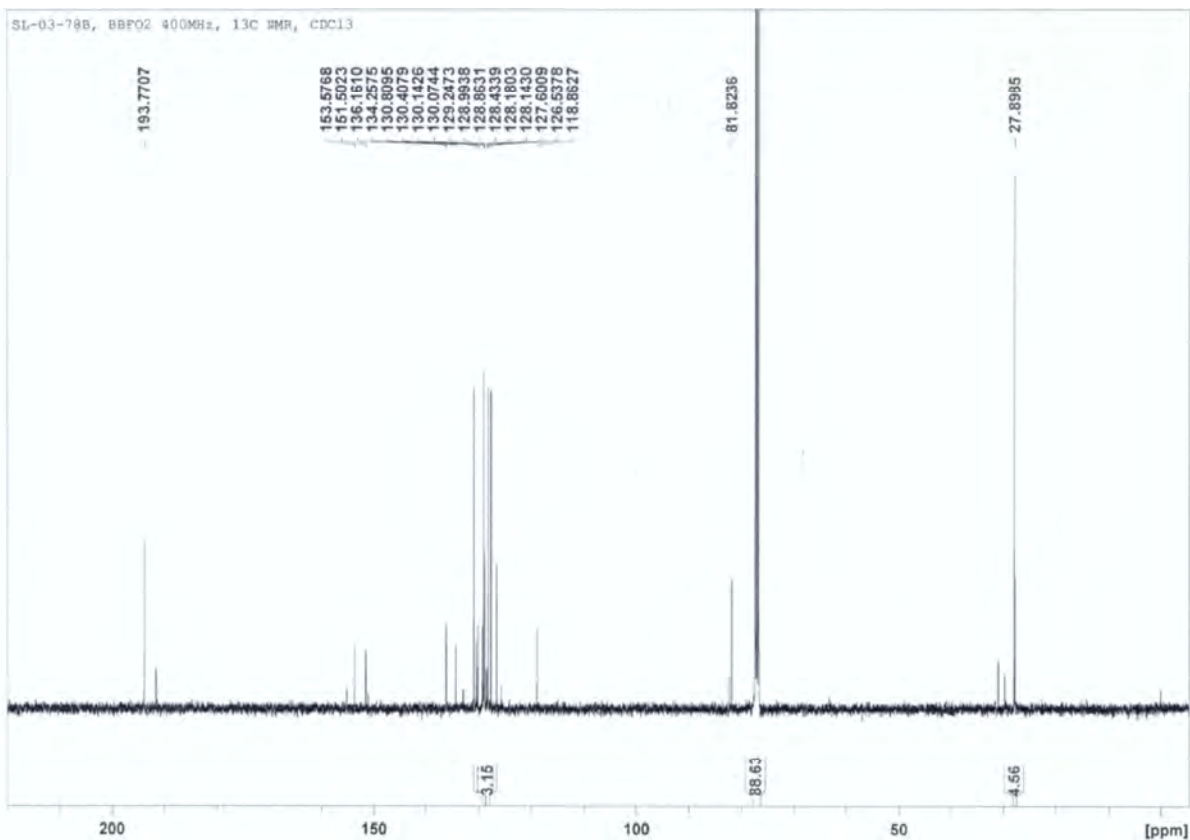

Compound 2a, 400 MHz, CDCl<sub>3</sub>, <sup>1</sup>H NMR

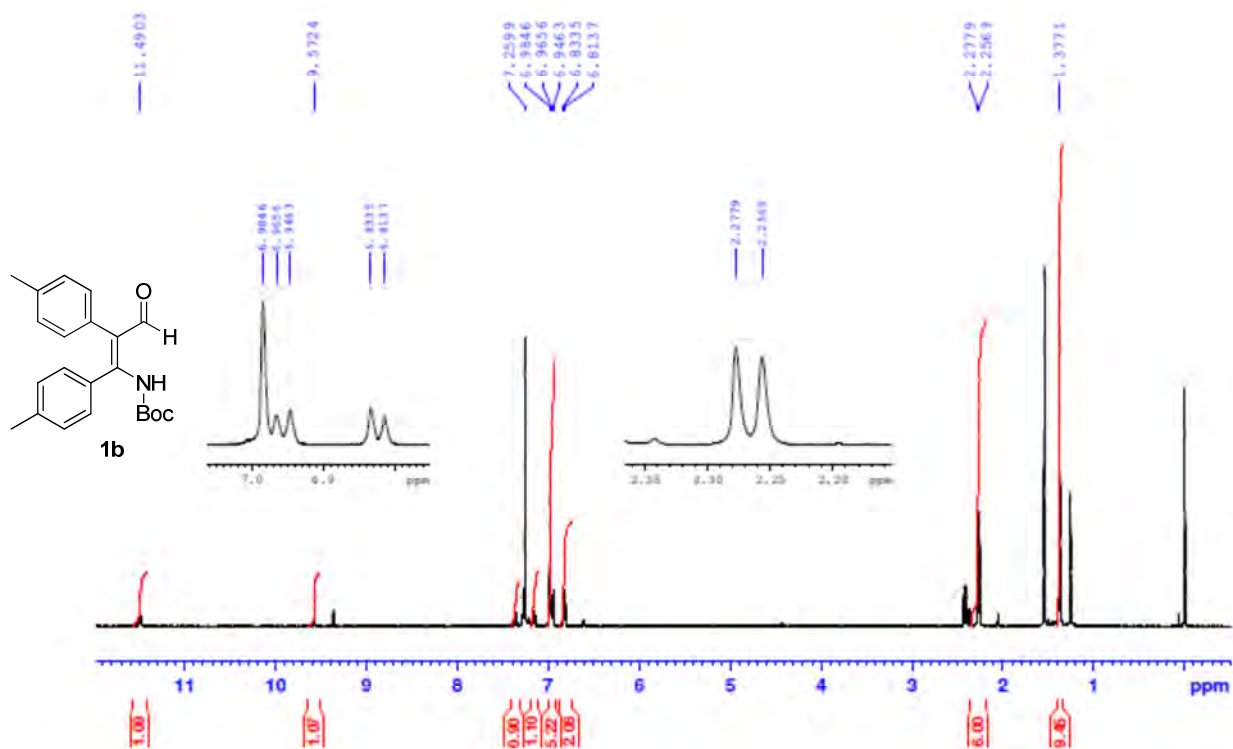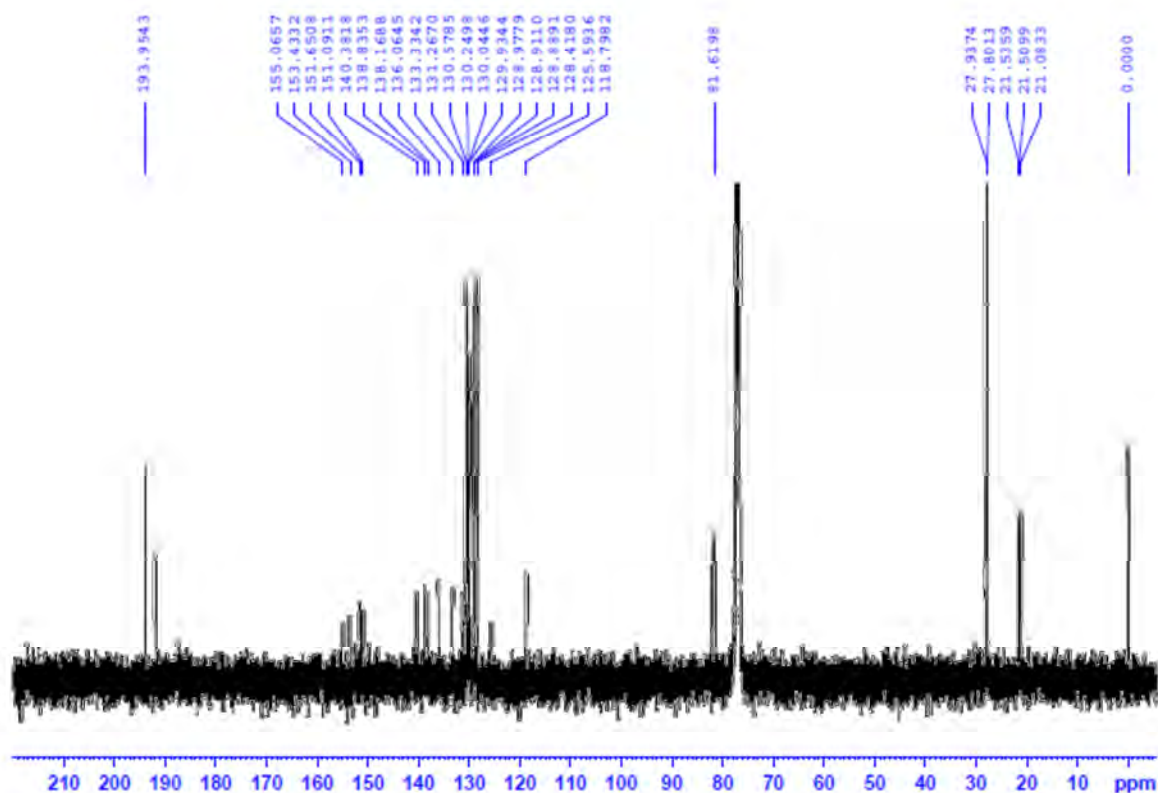



Compound 1c, CDCl<sub>3</sub>, <sup>1</sup>H NMR, 400 MHz

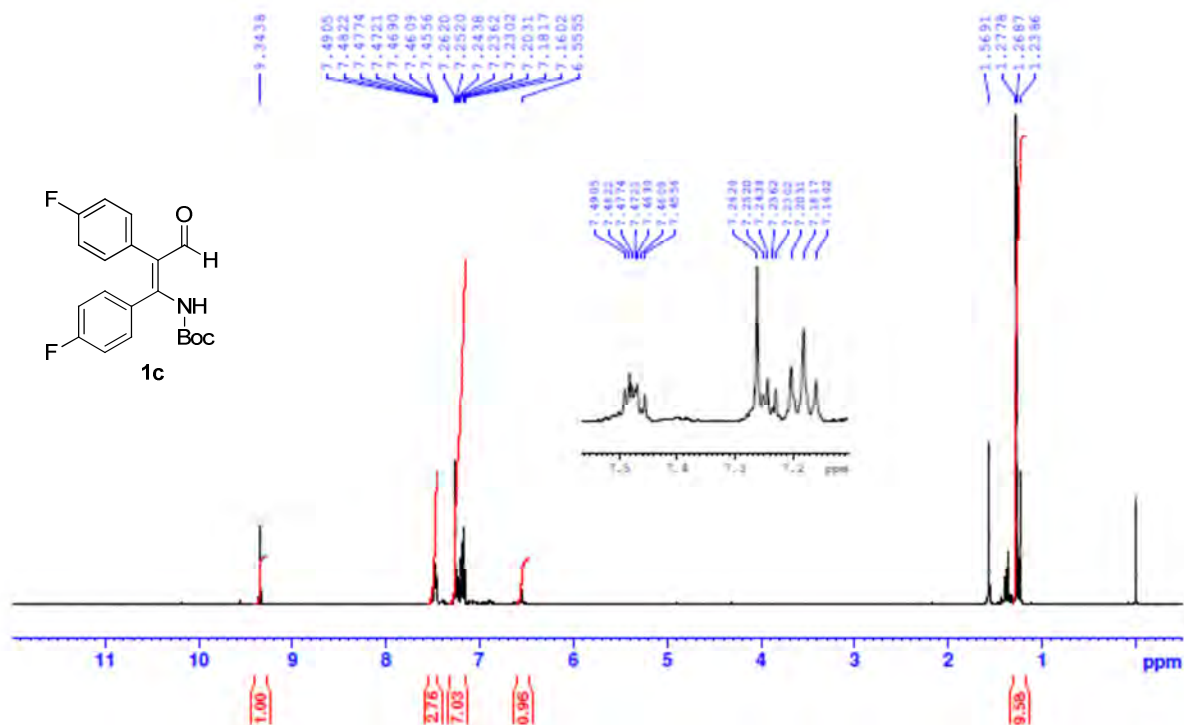

Compound 1c, CDCl<sub>3</sub>, <sup>13</sup>C NMR, 400 MHz

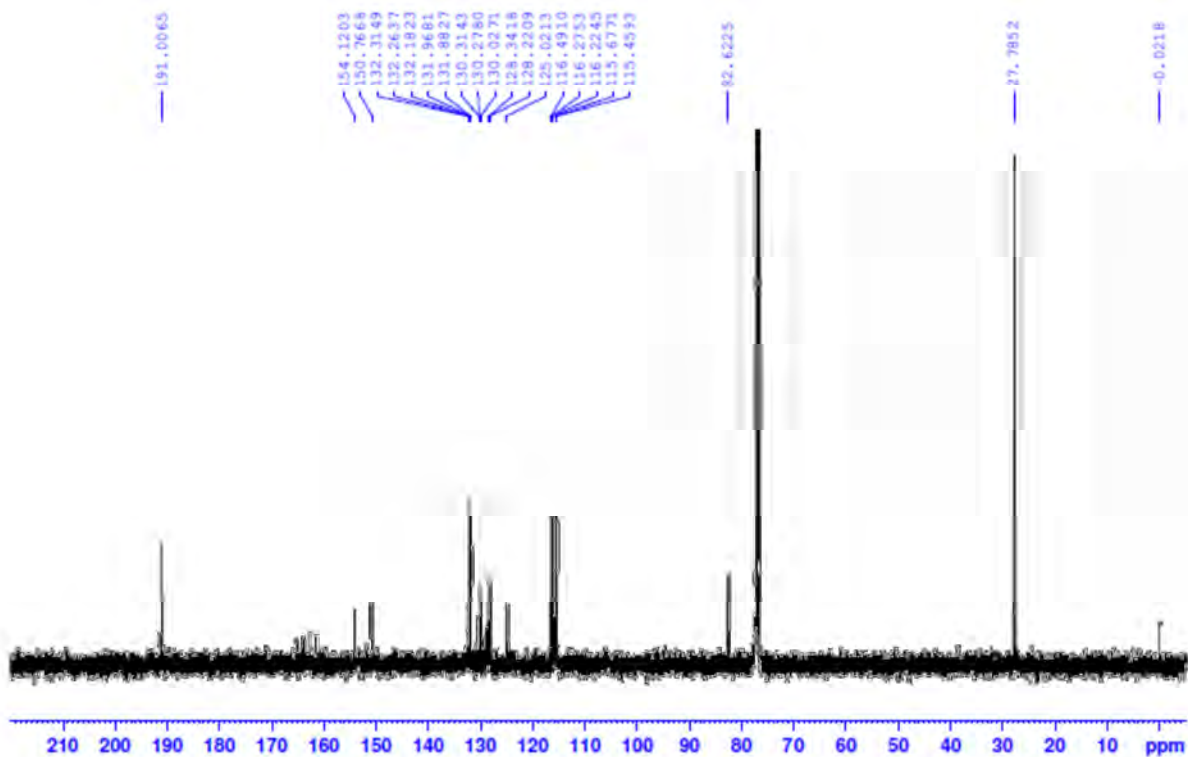

Compound 1d, <sup>1</sup>H NMR, 400 MHz, CDCl<sub>3</sub>

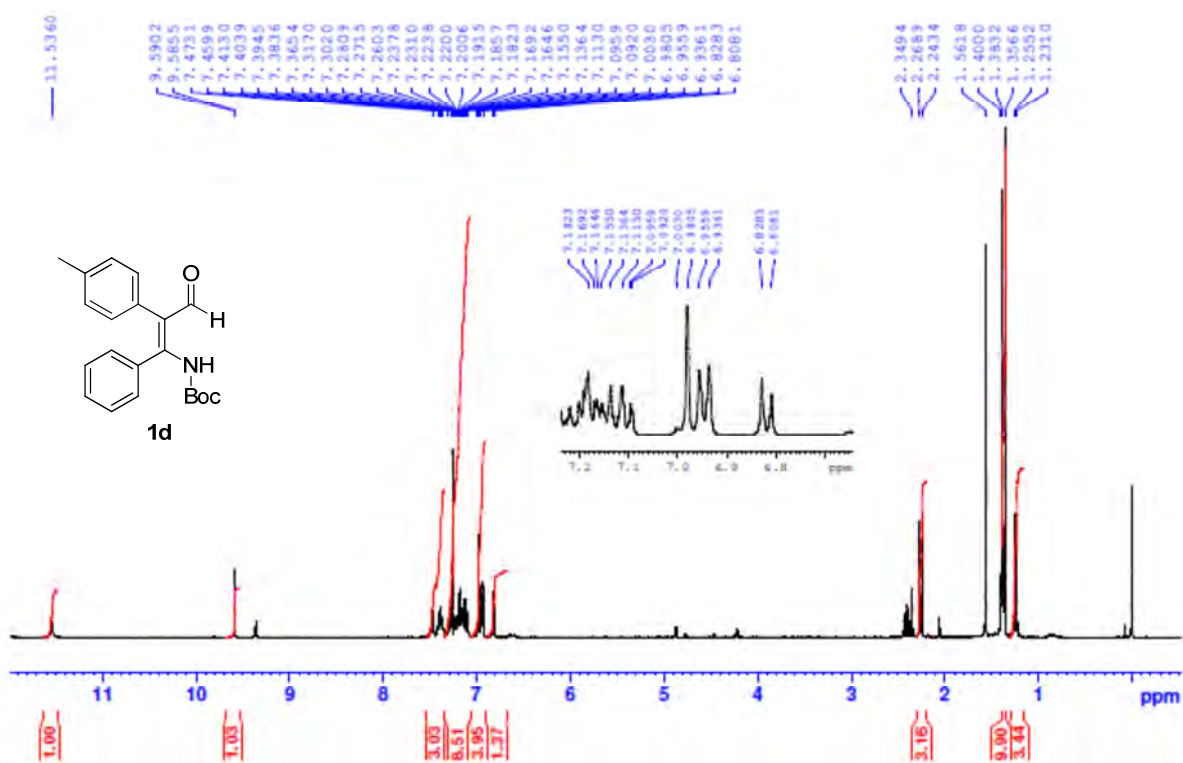

Compound 1d, <sup>13</sup>C NMR, 400 MHz, CDCl<sub>3</sub>

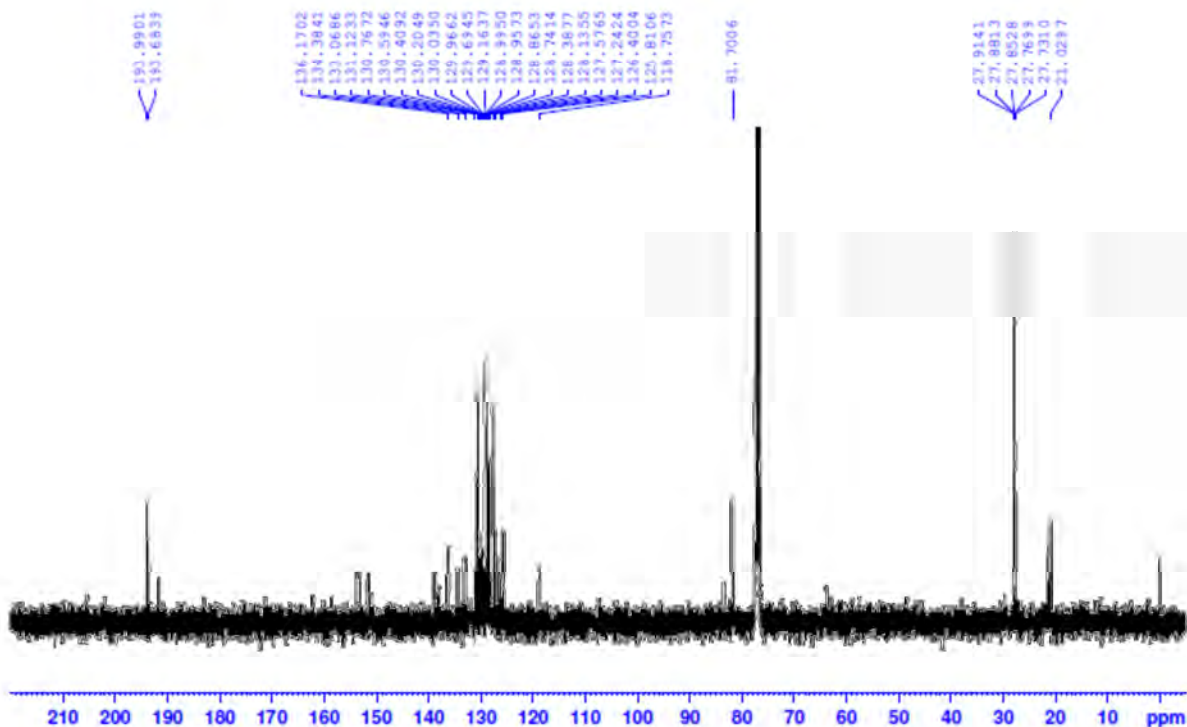

Compound 1e, 400 MHz, CDCl<sub>3</sub>, <sup>1</sup>H NMR

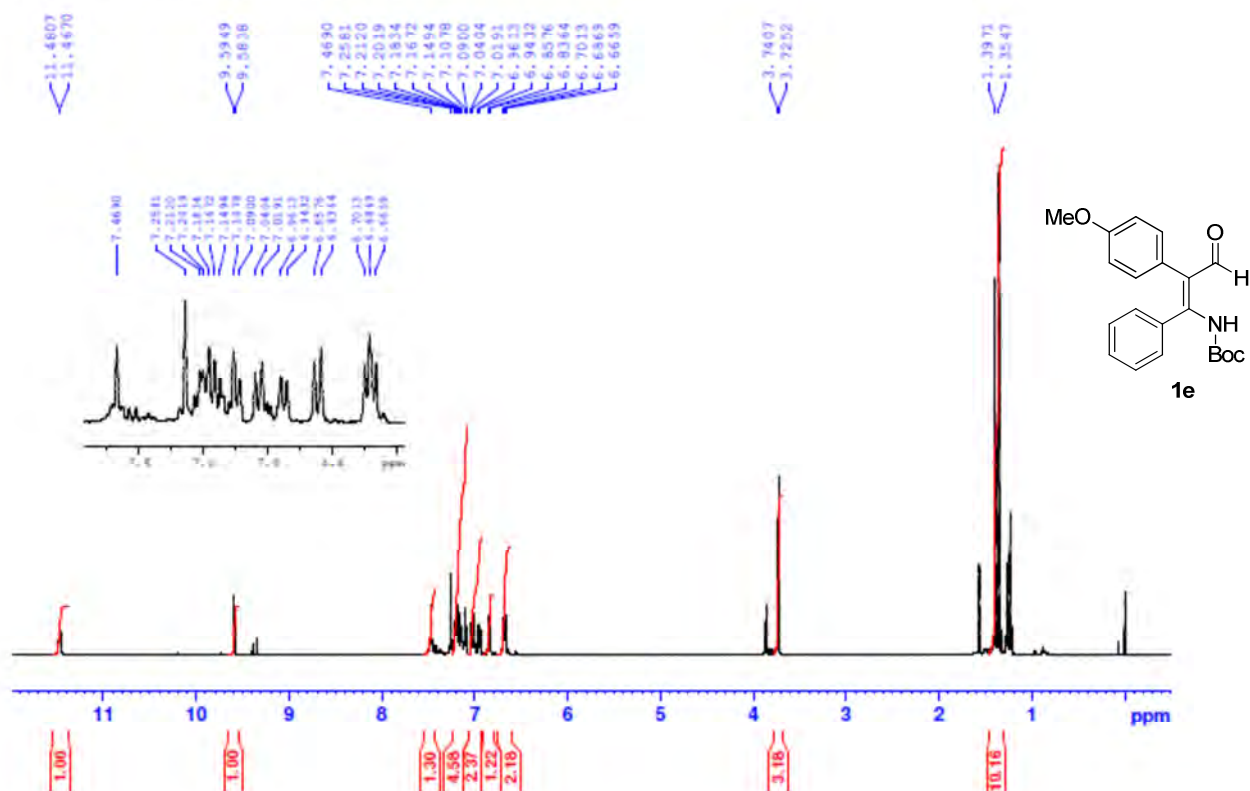

Compound 1e, 400 MHz, CDCl<sub>3</sub>, <sup>13</sup>C NMR

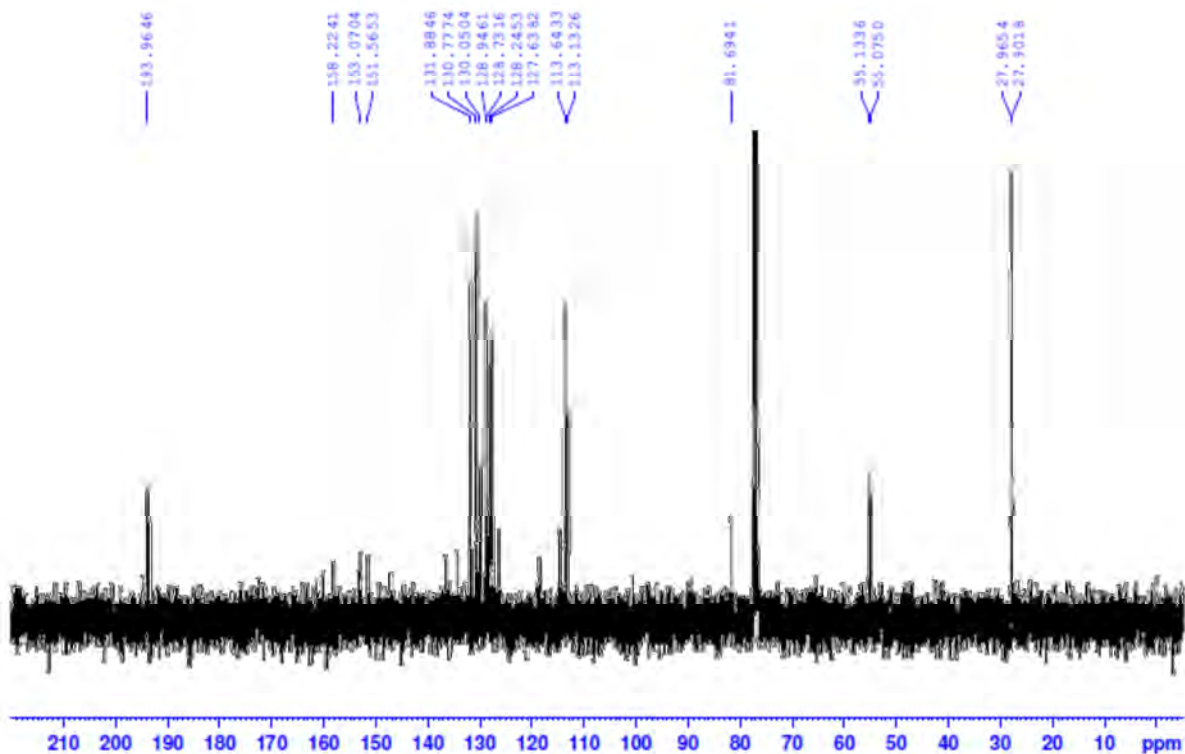



Compound 1f, CDCl<sub>3</sub>, <sup>1</sup>H NMR, 400 MHz, BBFO2

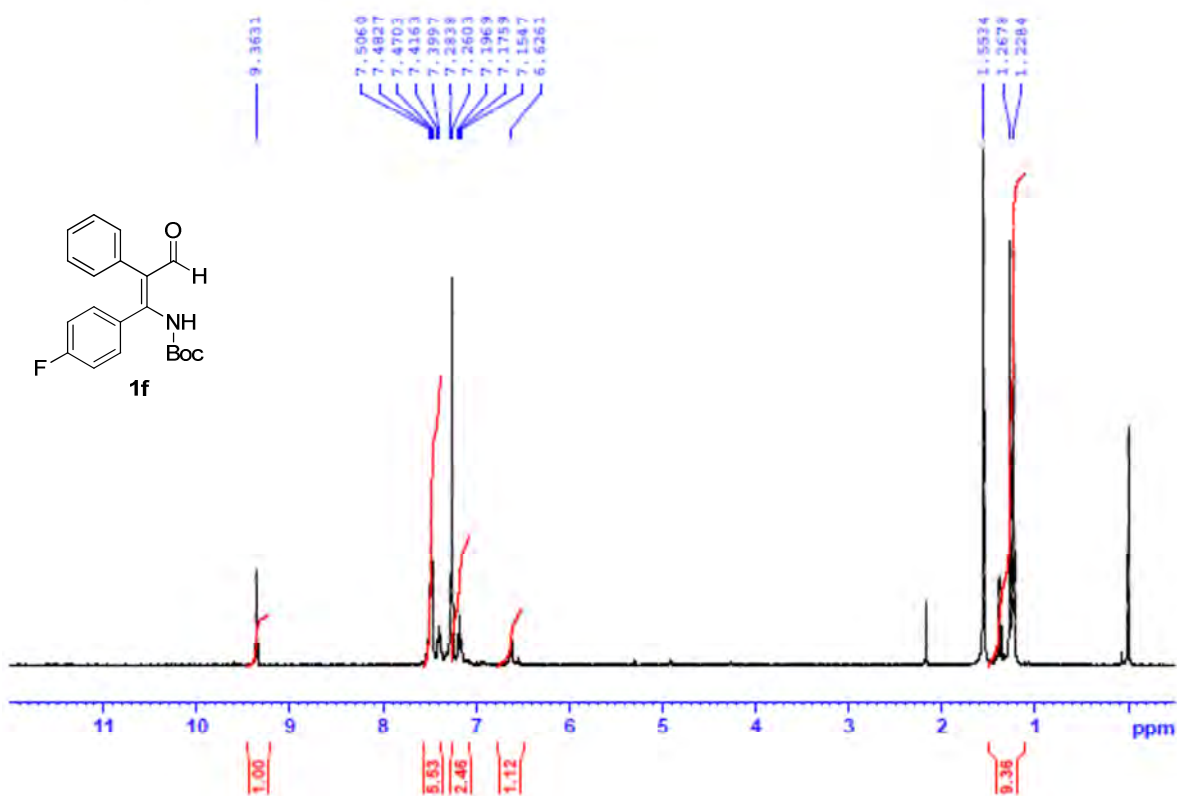

Compound 1f, <sup>13</sup>C NMR, 400 MHz, CDCl<sub>3</sub>

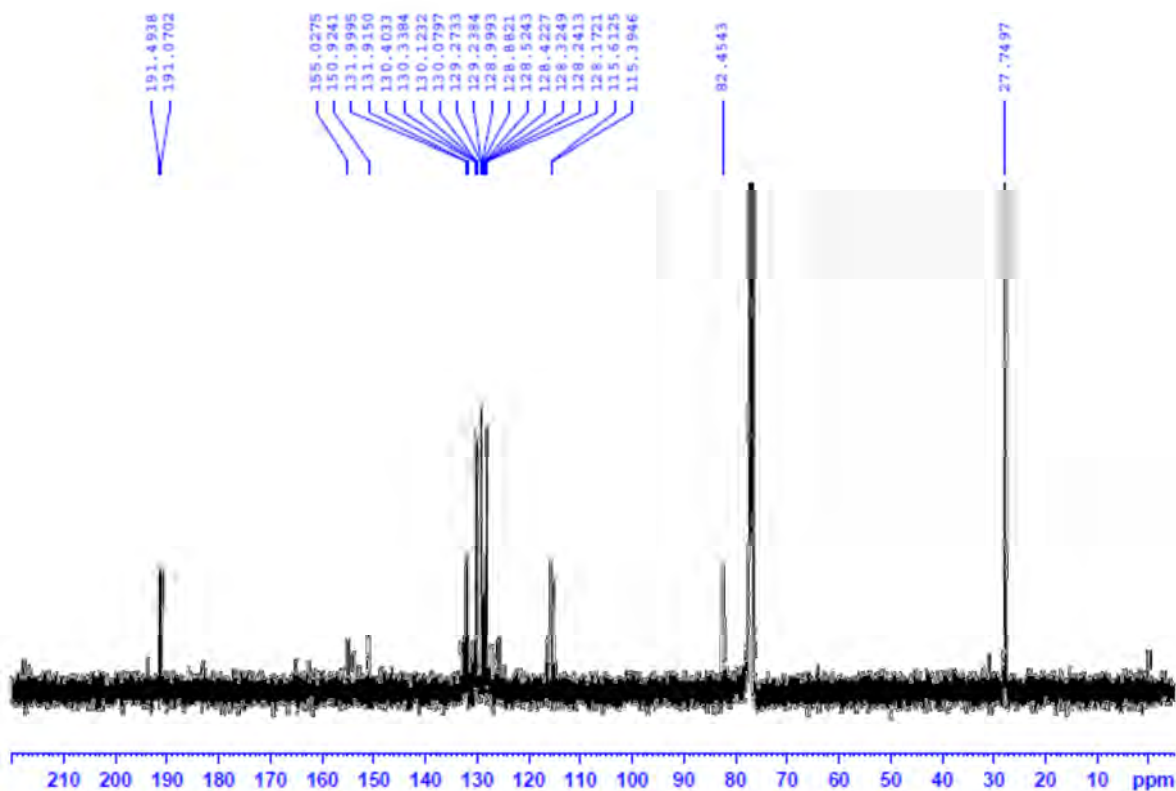

**<sup>1</sup>H and <sup>13</sup>C NMR spectra of N-Benzyl-γ-amino-α,β-unsaturated aldehyde (1I)**

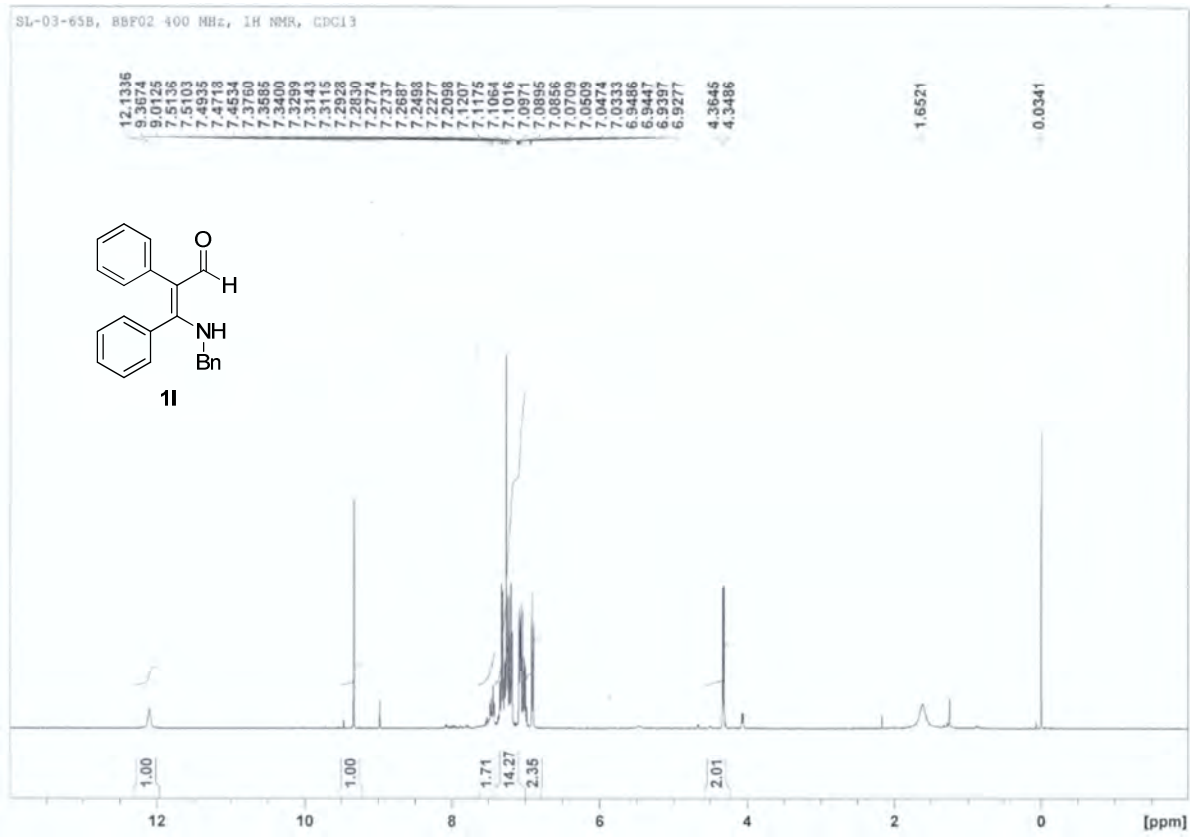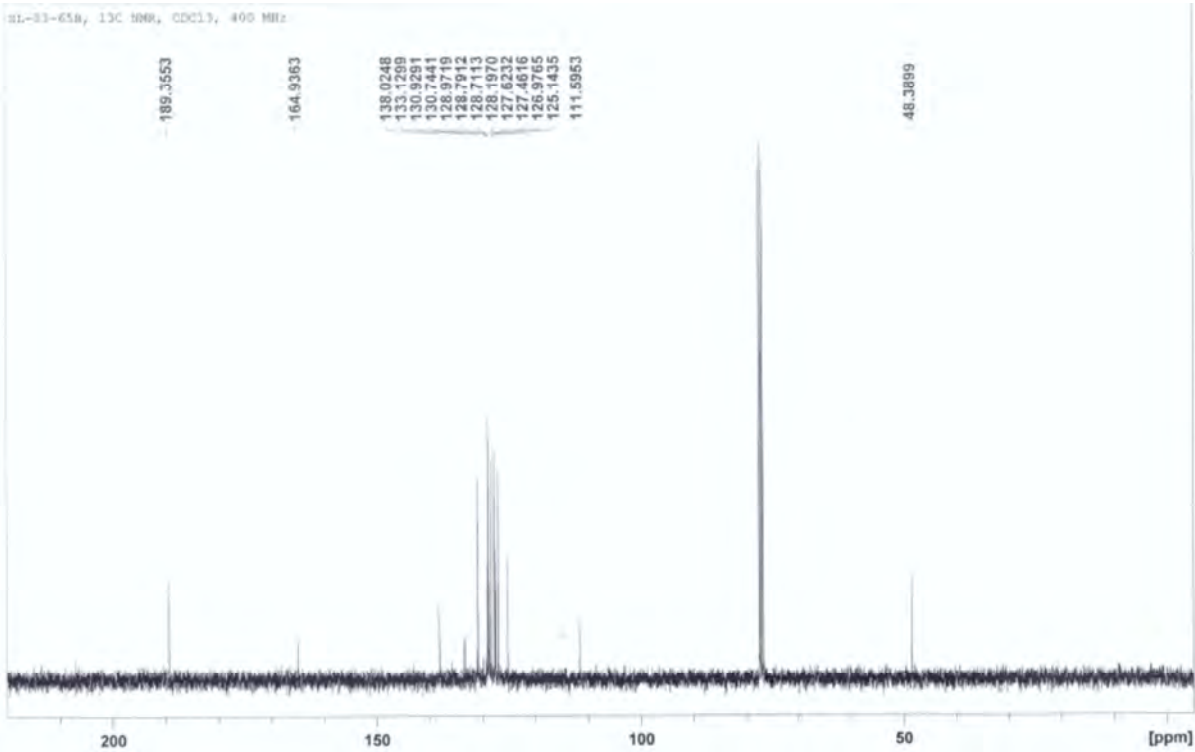

# <sup>1</sup>H and <sup>13</sup>C NMR spectra of polysubstituted pyrrole derivatives (3)

Compound 3a, <sup>1</sup>H NMR, 400 MHz, CDCl<sub>3</sub>

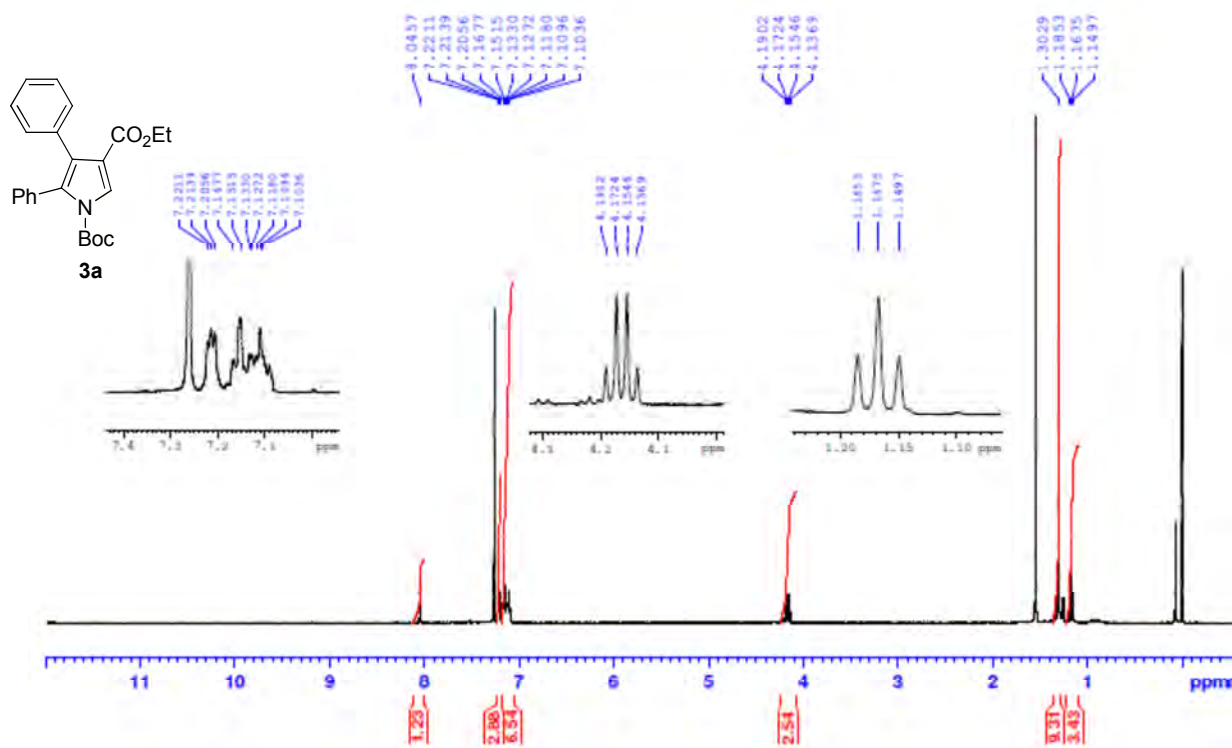

Compound 3a, 400 MHz, <sup>13</sup>C NMR, CDCl<sub>3</sub>

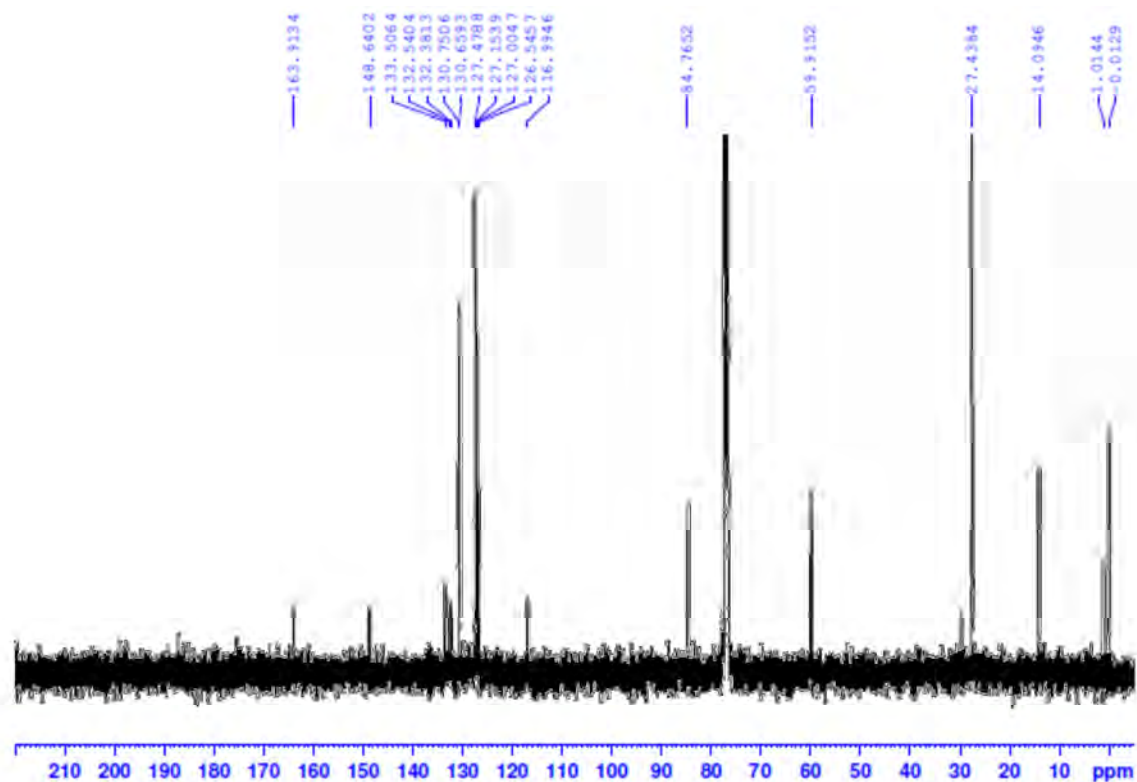

Compound 3b, AV 400 MHz, <sup>1</sup>H NMR, CDC13

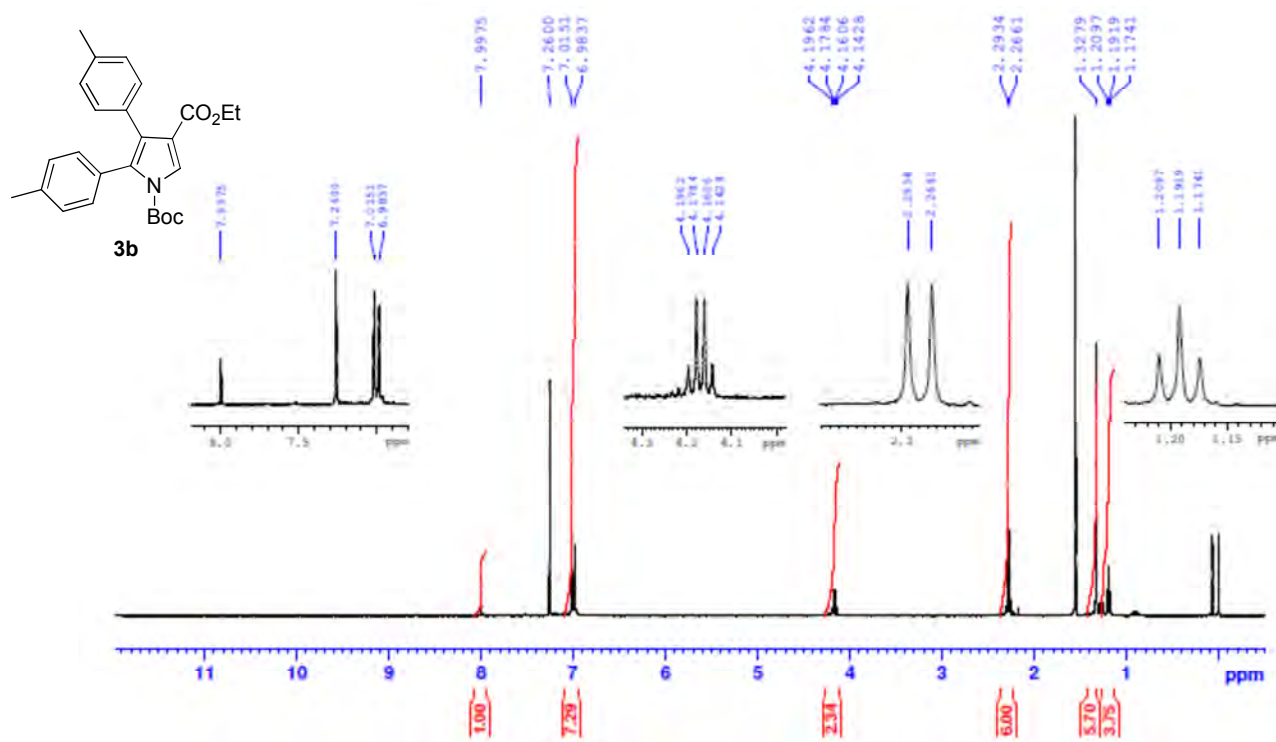

Compound 3b, 400MHz, <sup>13</sup>C NMR, CDC13

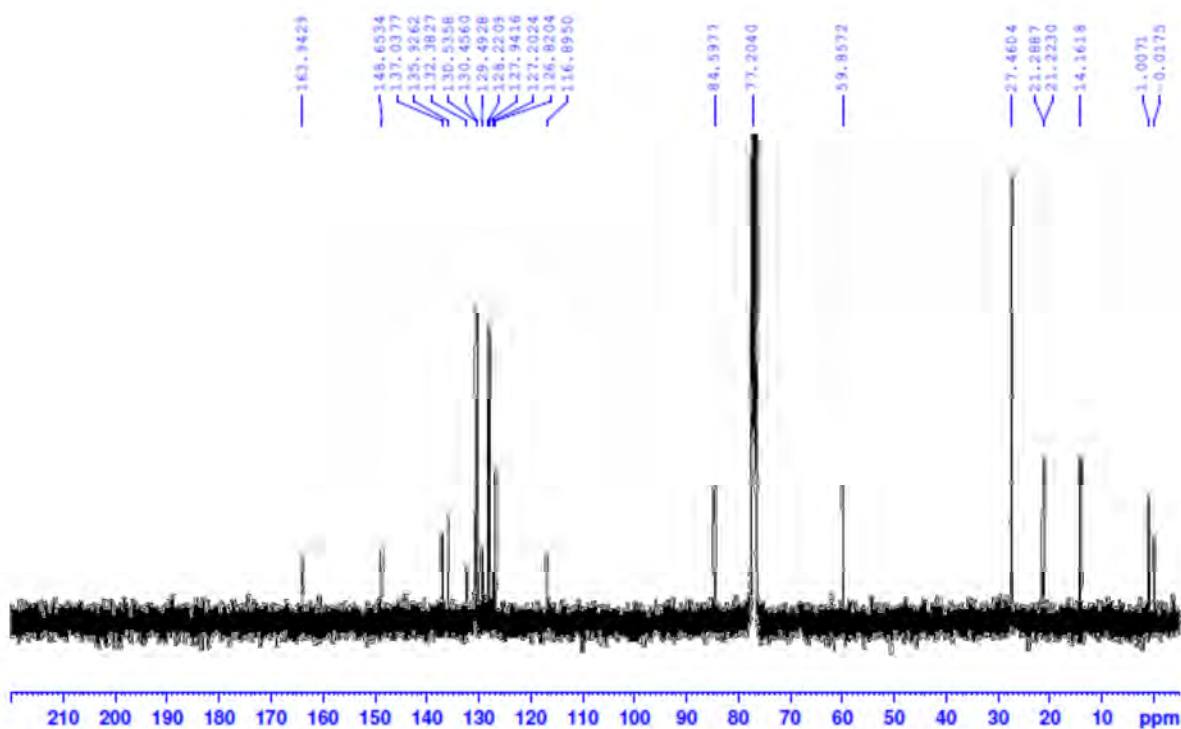





Compound 3d, <sup>1</sup>H NMR, 400 MHz, CDCl<sub>3</sub>

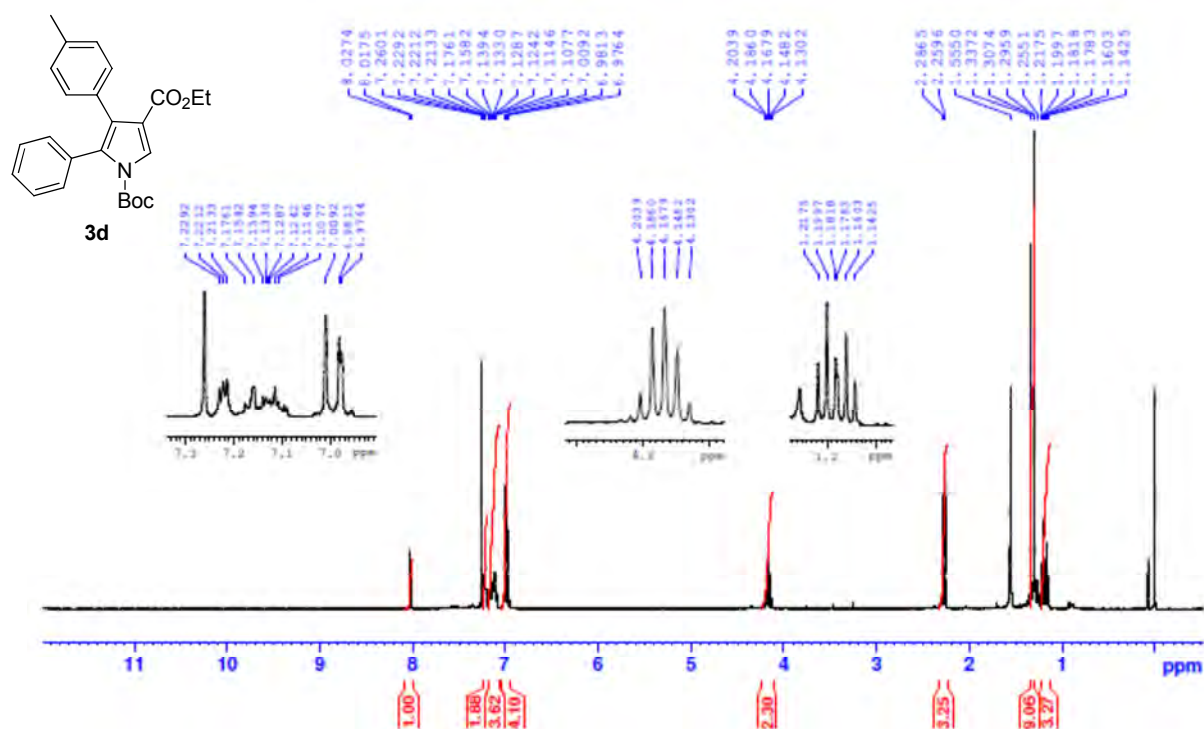

Compound 3d, <sup>13</sup>C NMR, 400 MHz, CDCl<sub>3</sub>

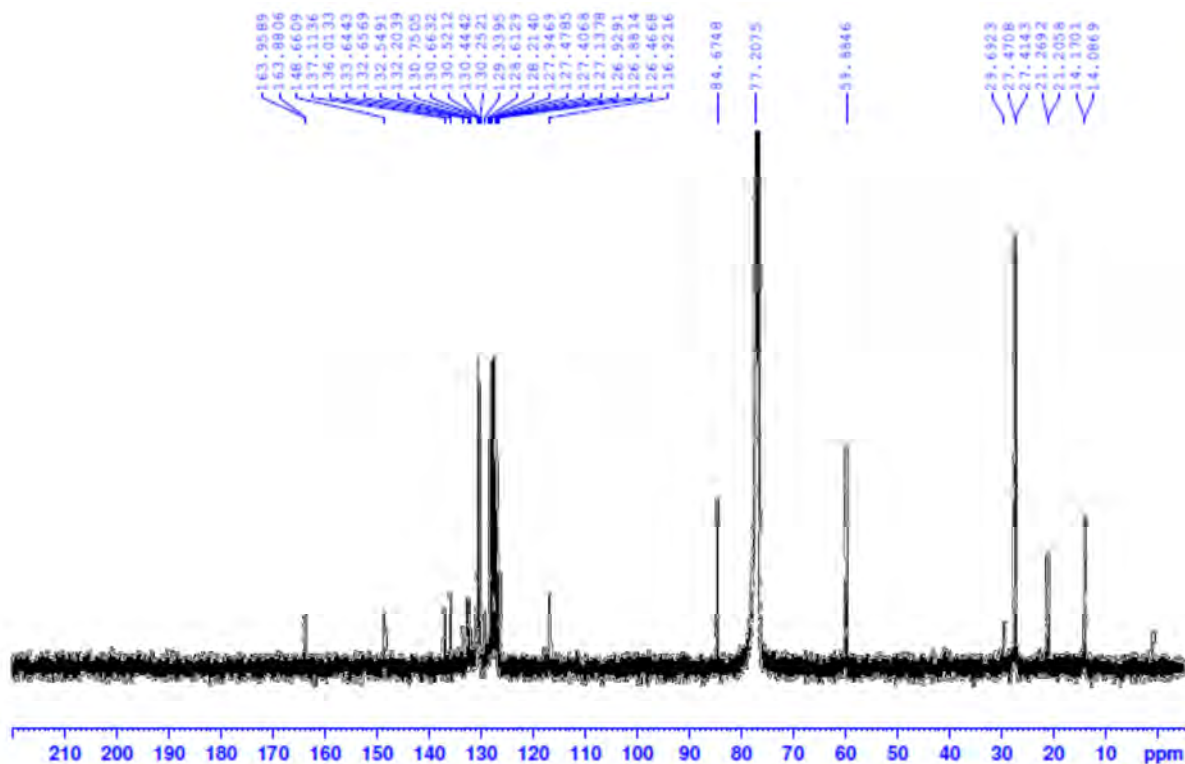

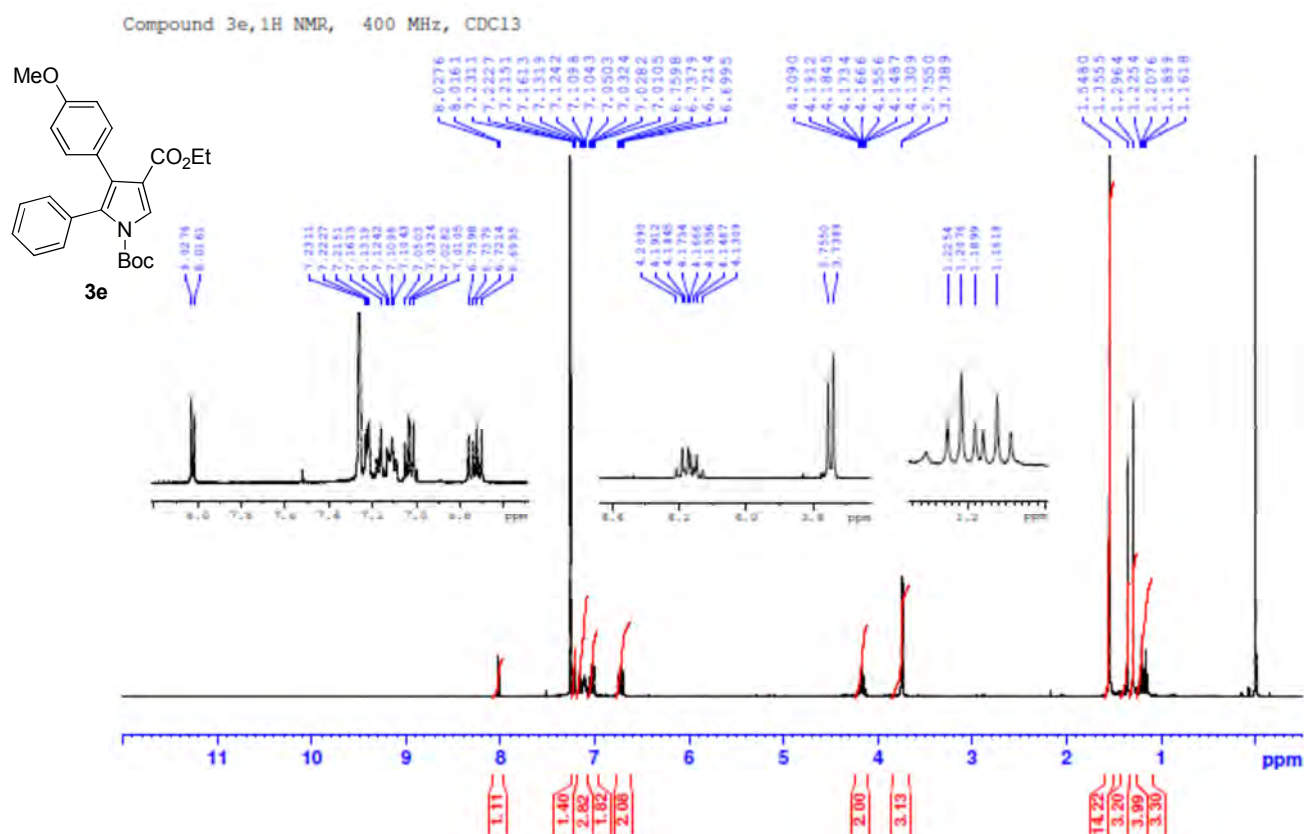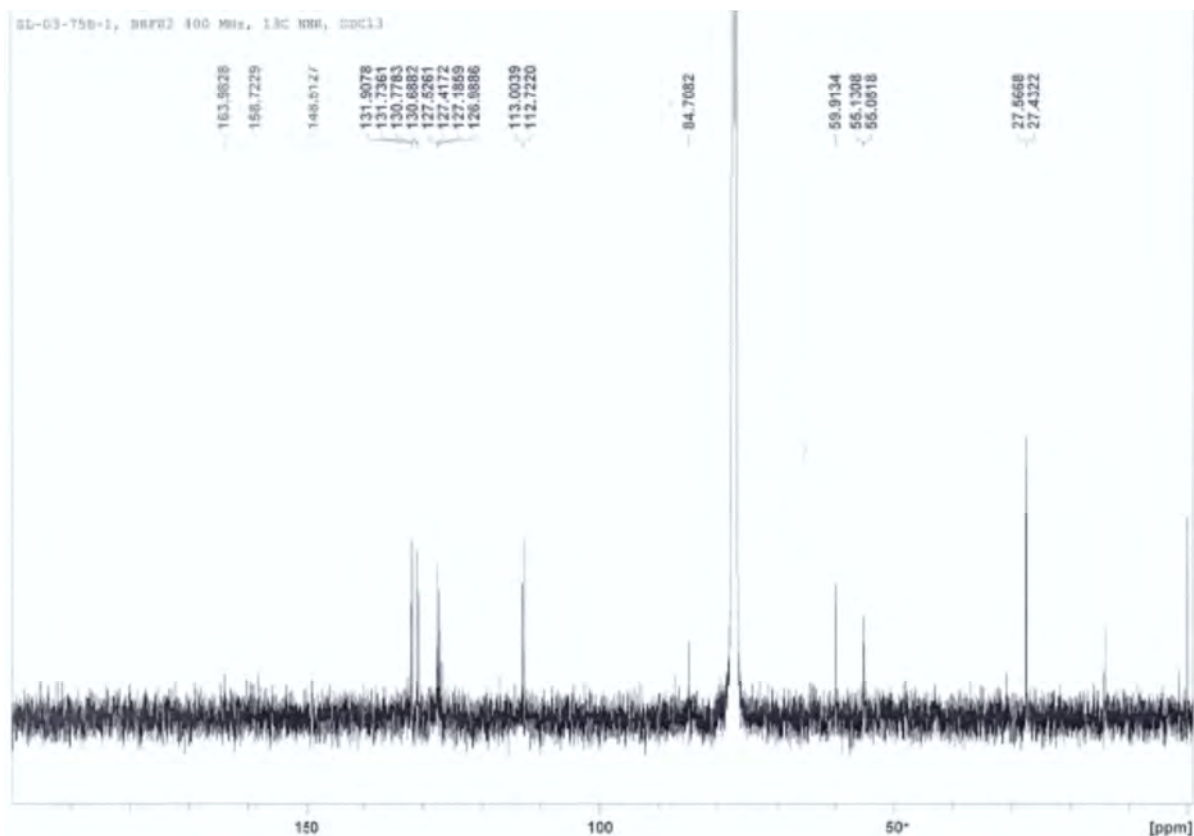

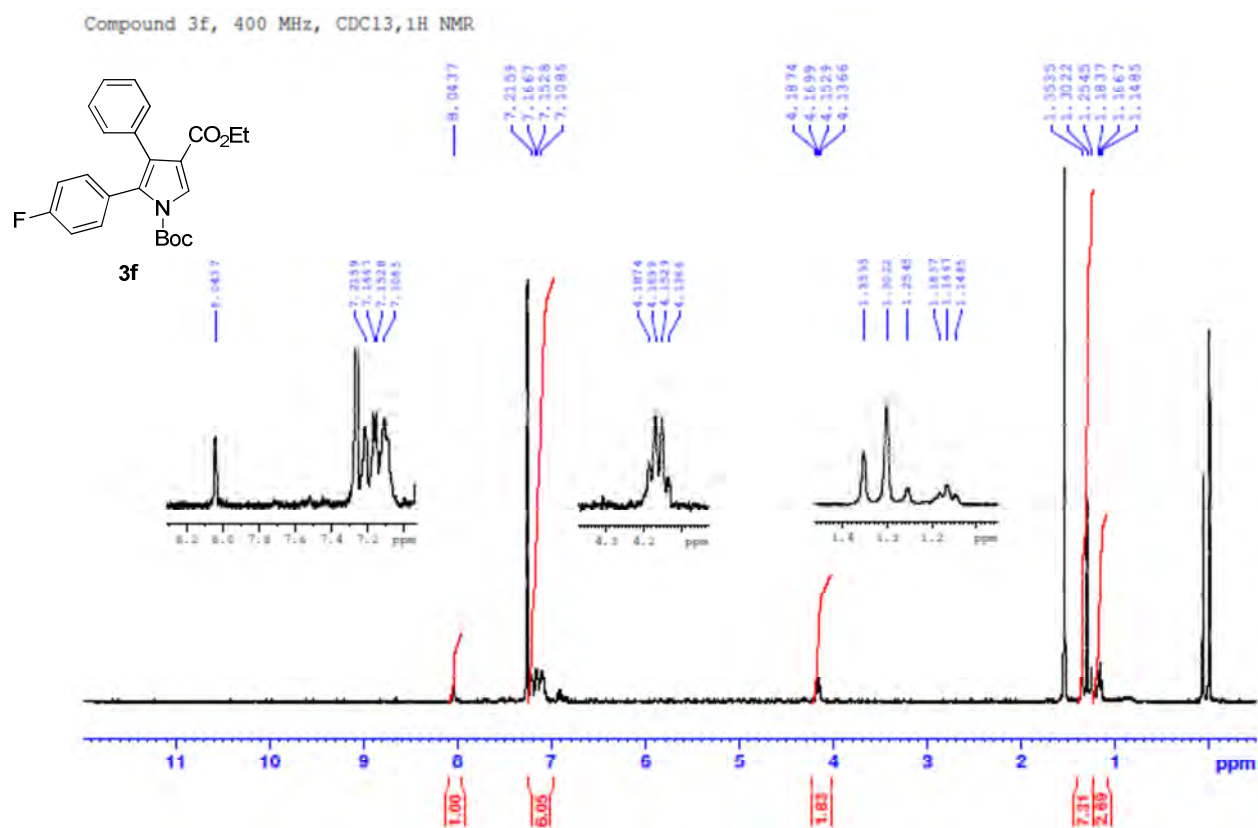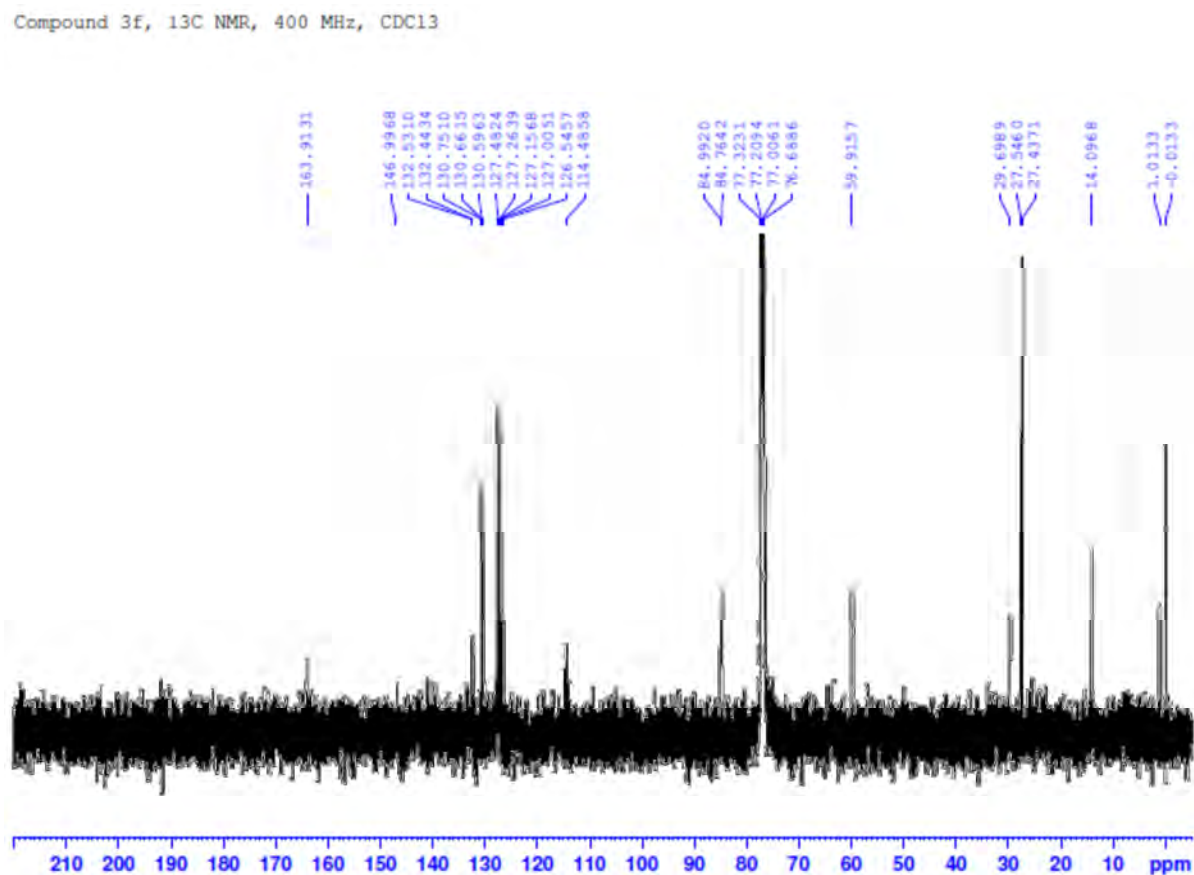



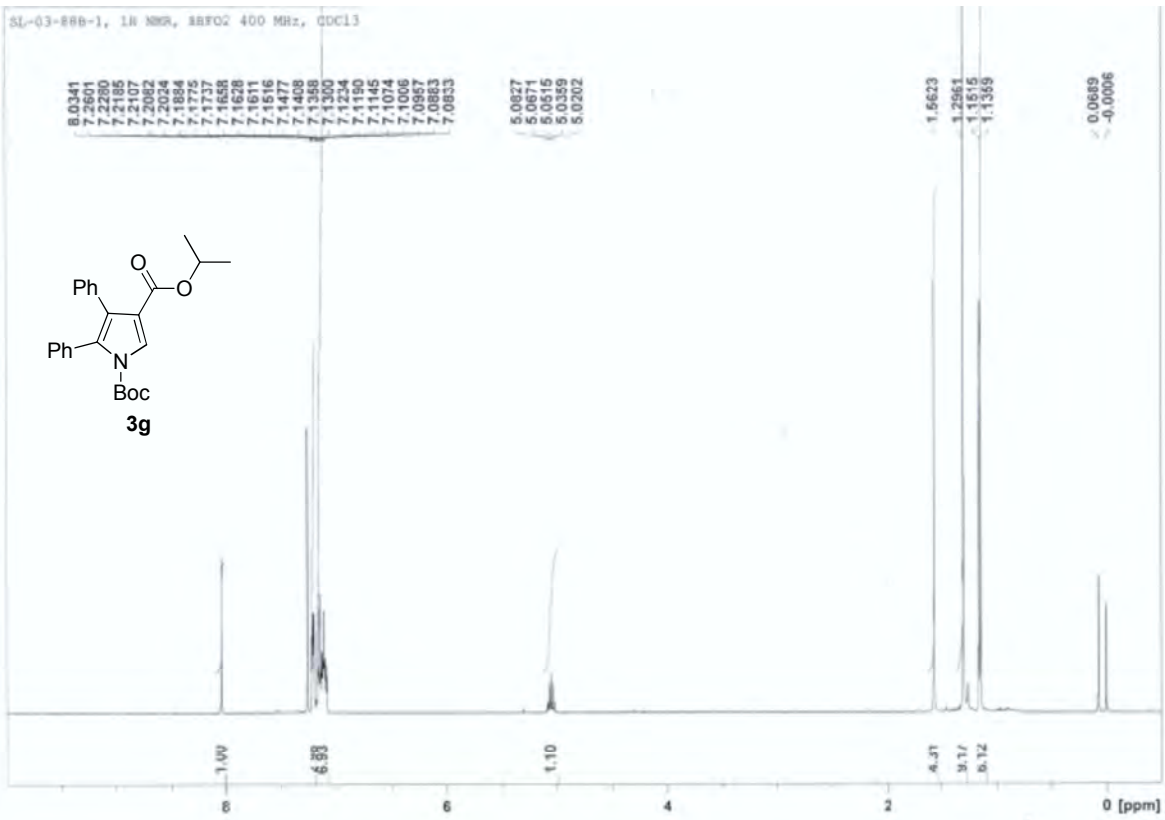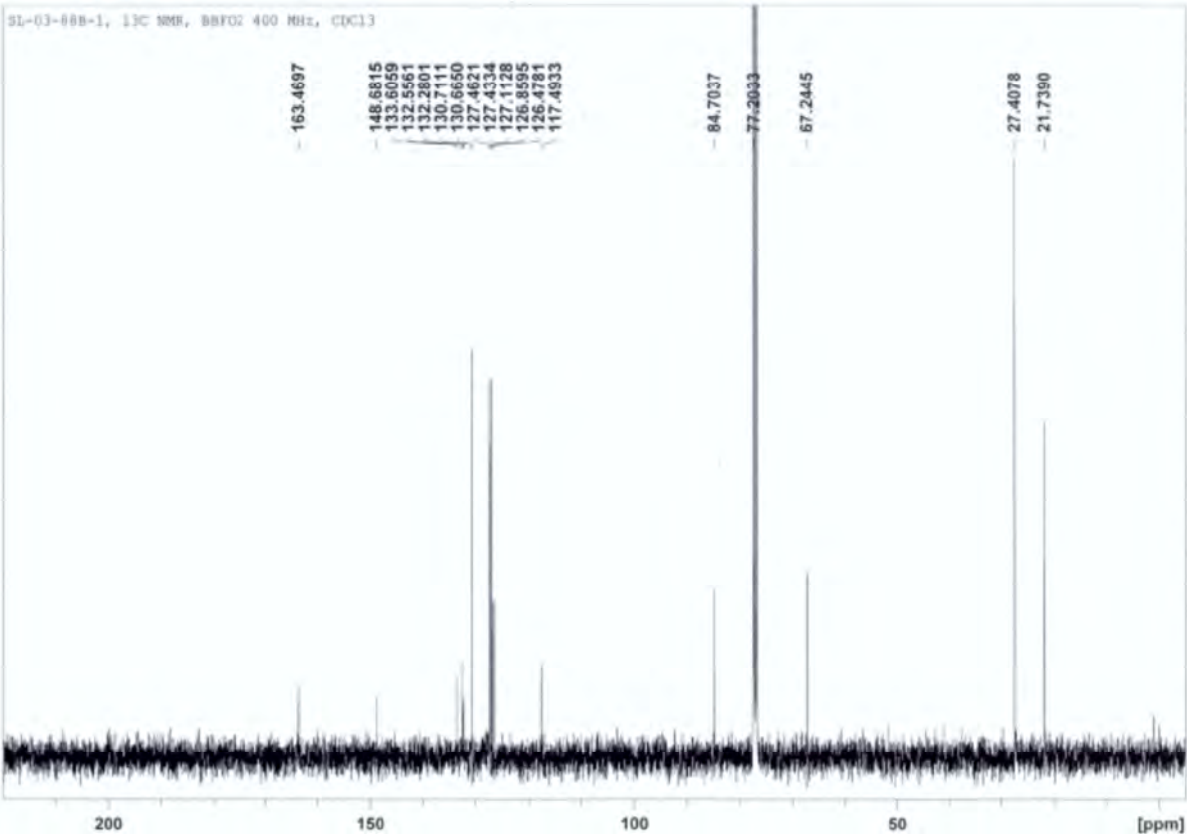

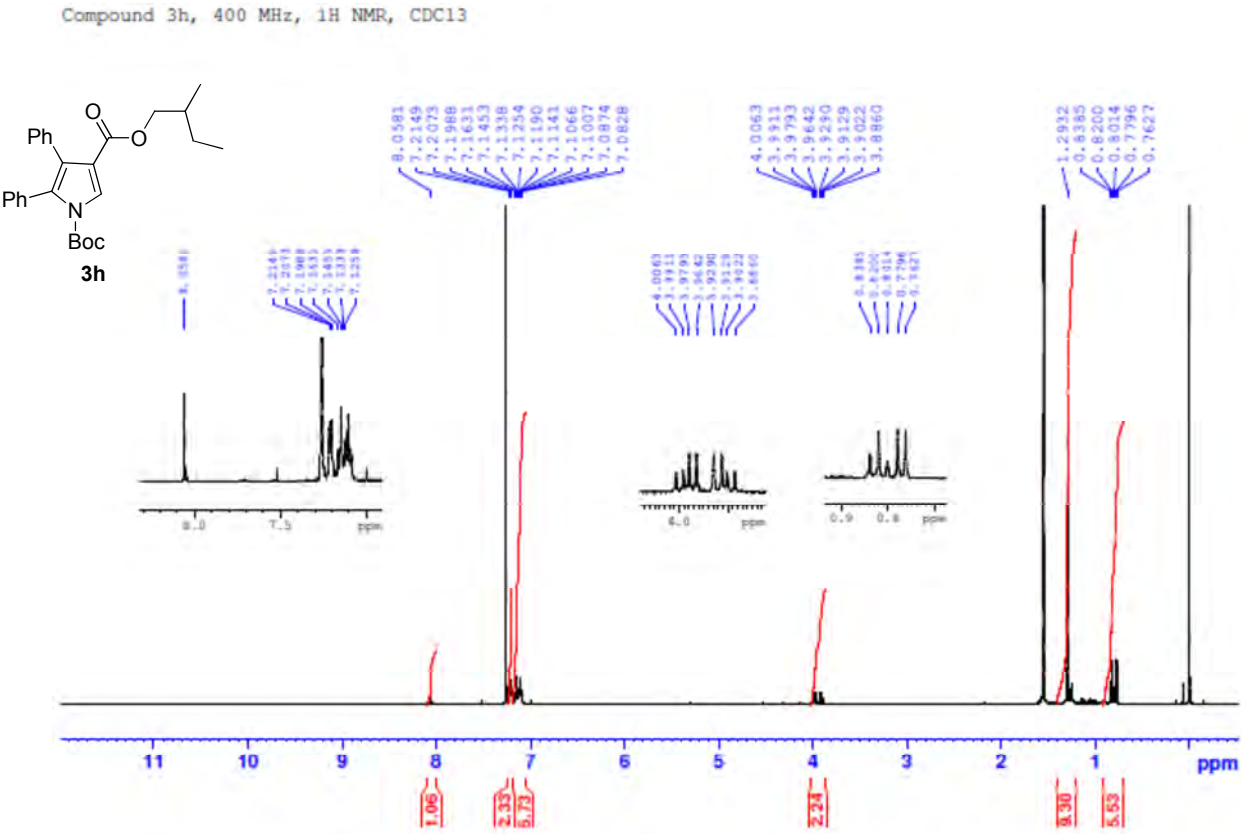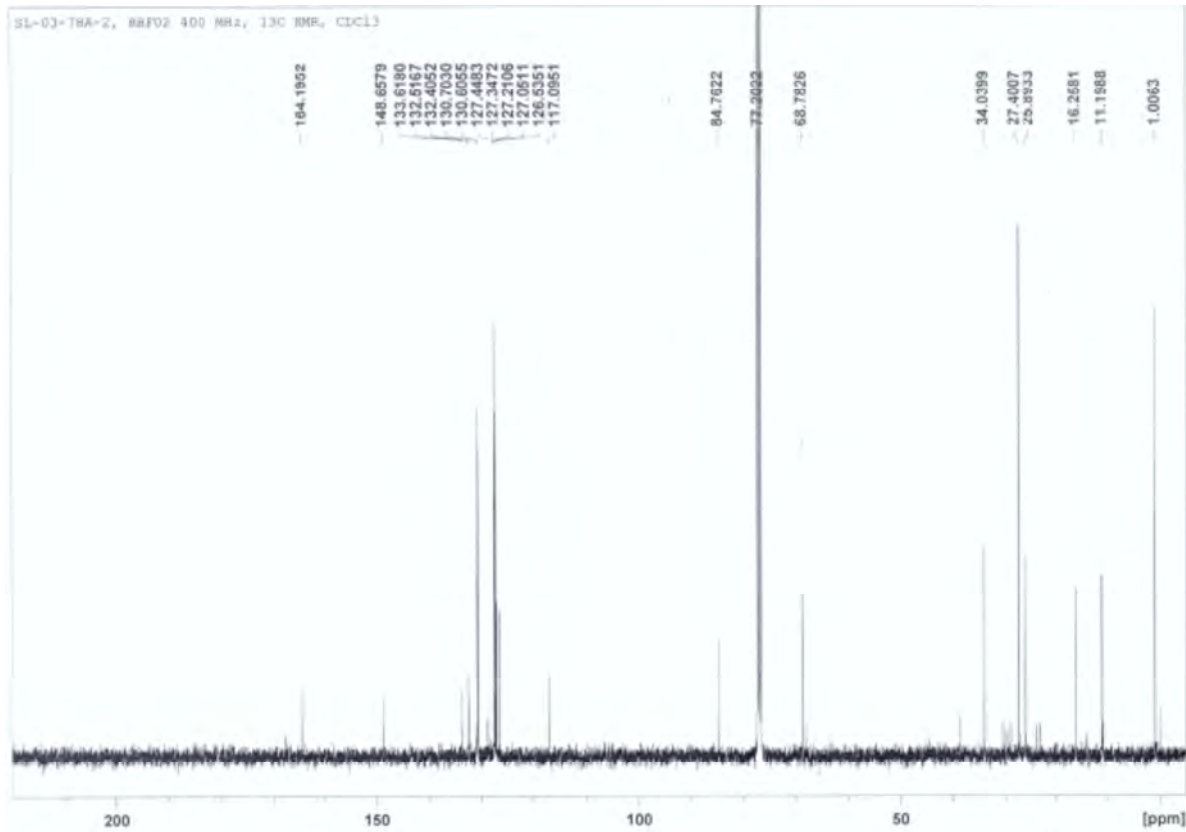

Compound 3i, <sup>1</sup>H NMR, 400 MHz, CDCl<sub>3</sub>

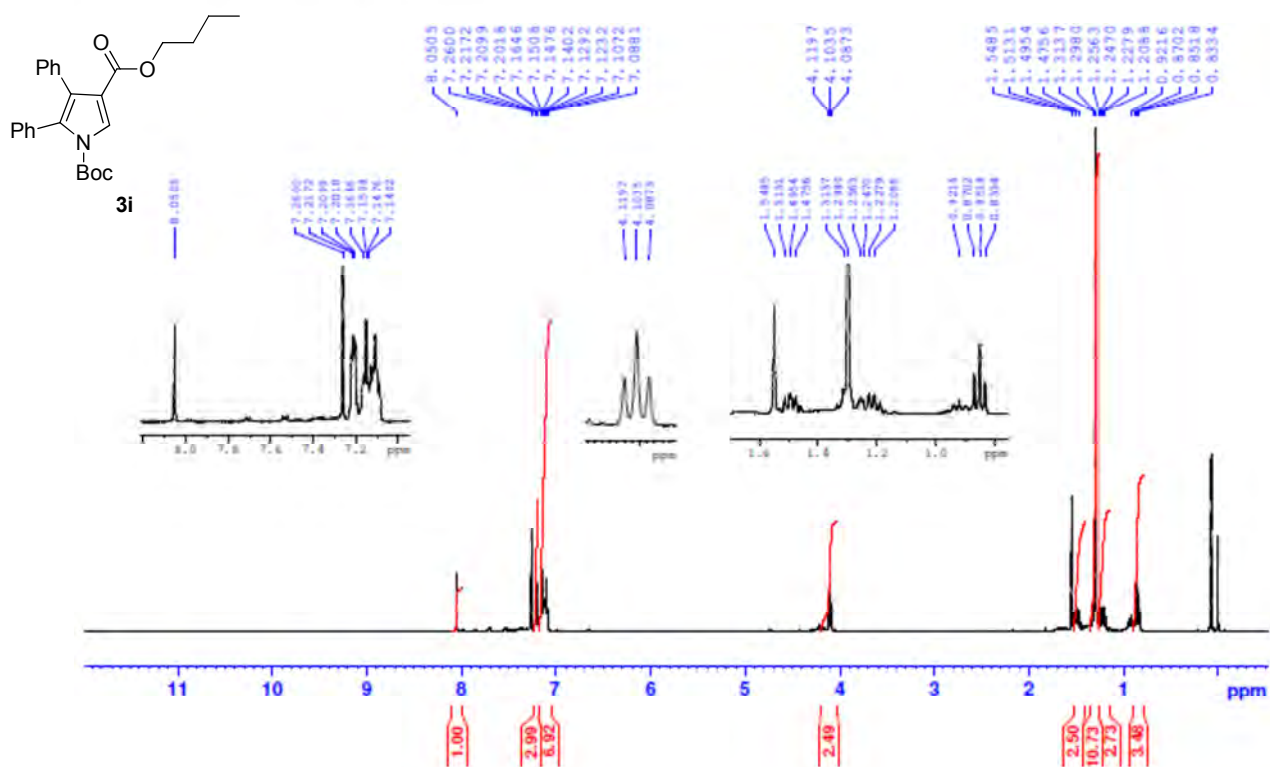

Compound 3i, <sup>13</sup>C NMR, 400 MHz, CDCl<sub>3</sub>

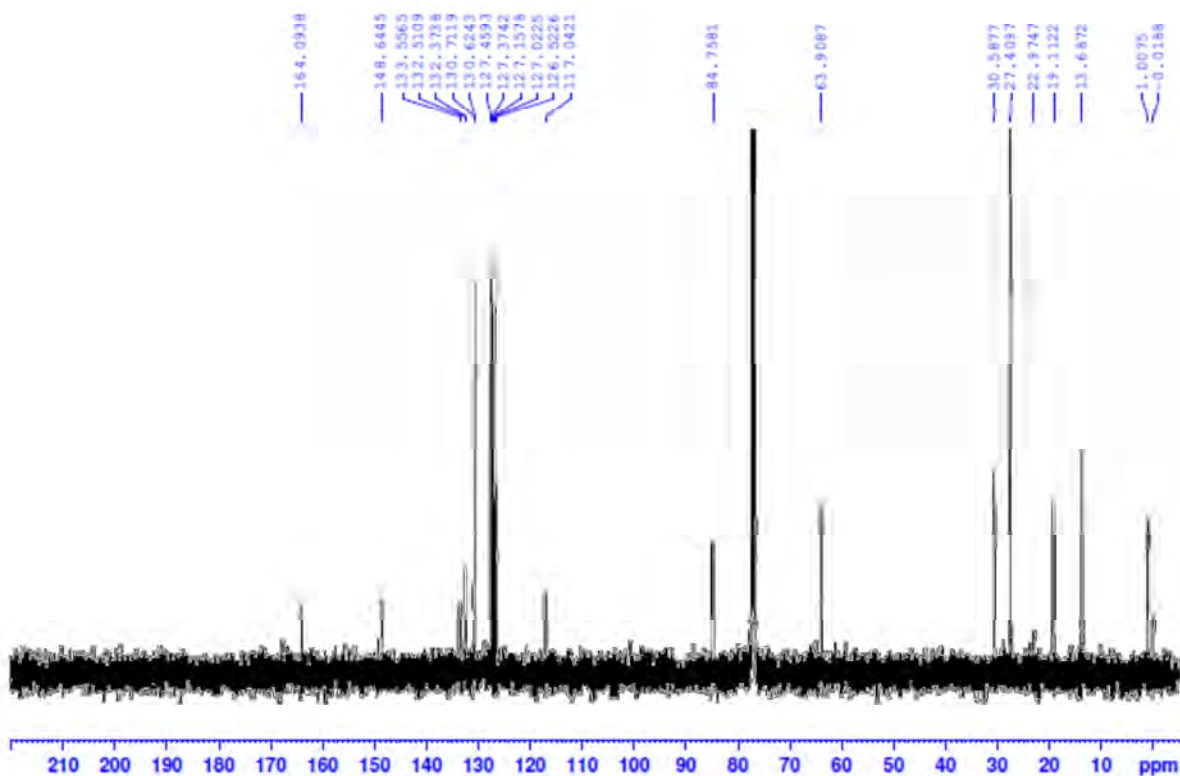

Compound 3j, CDCl<sub>3</sub>, <sup>1</sup>H NMR, 400MHz

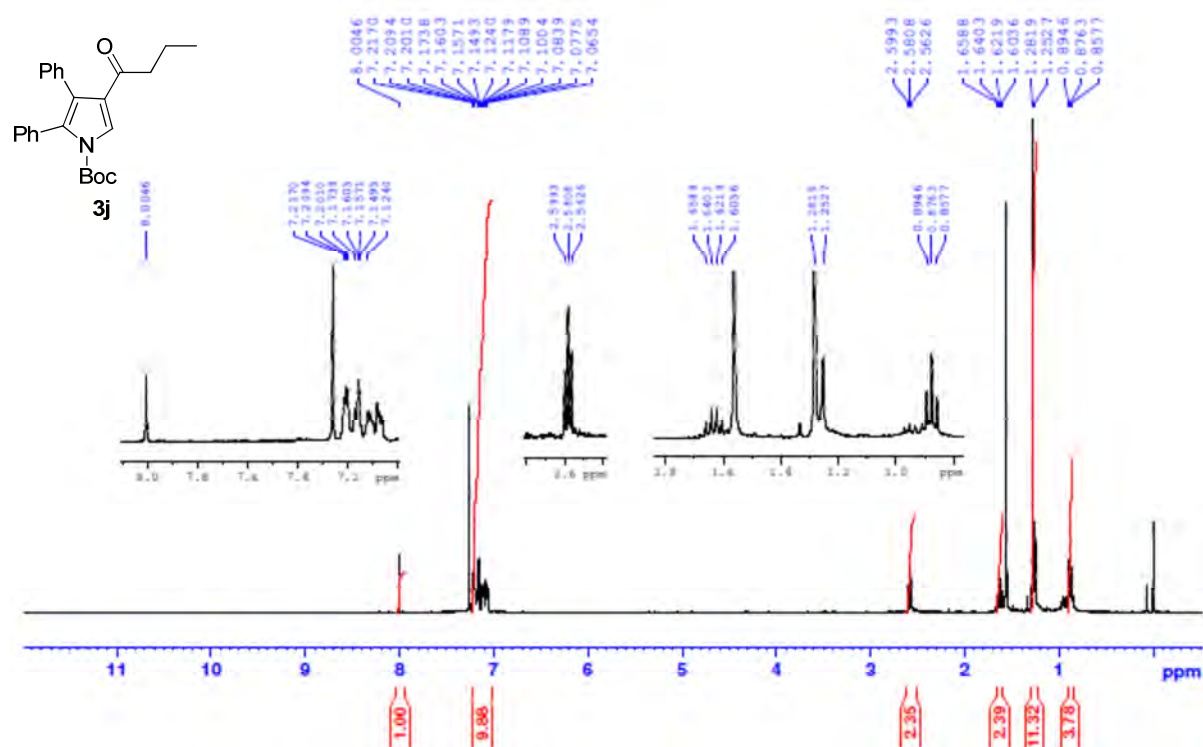

Compound 3j, CDCl<sub>3</sub>, <sup>13</sup>C NMR, 400MHz

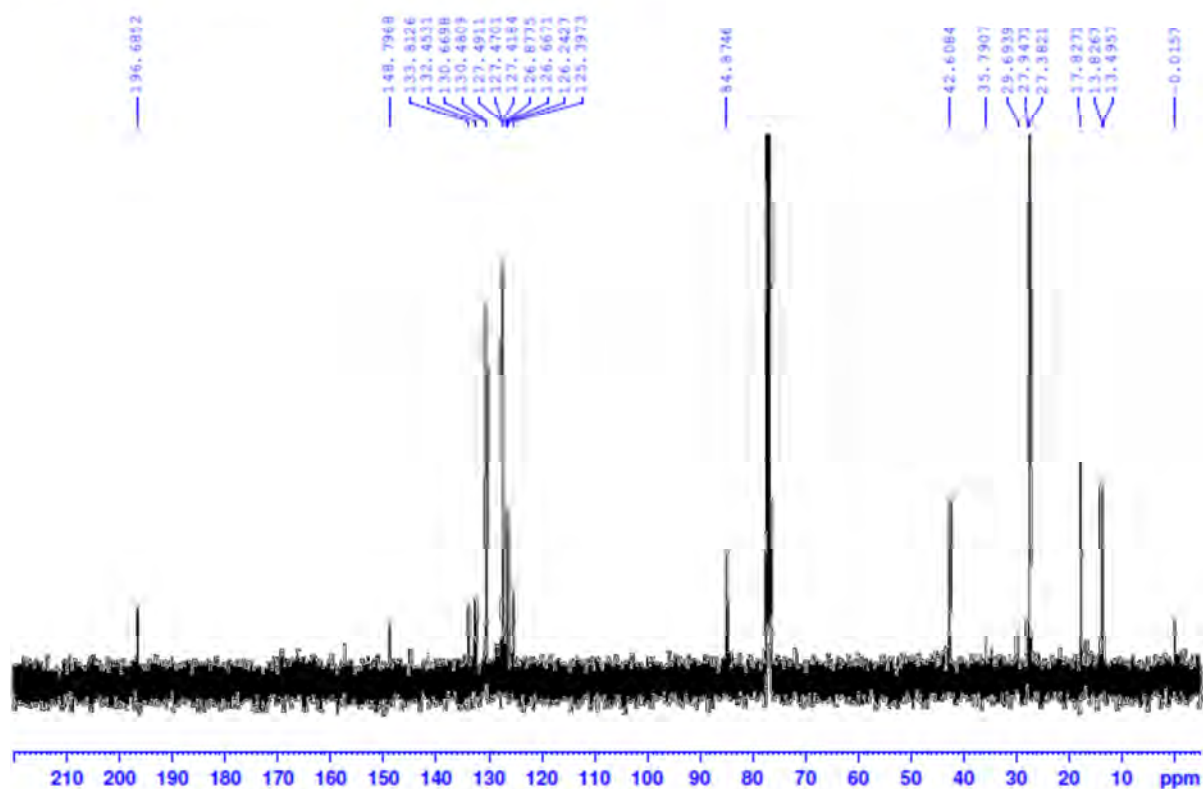

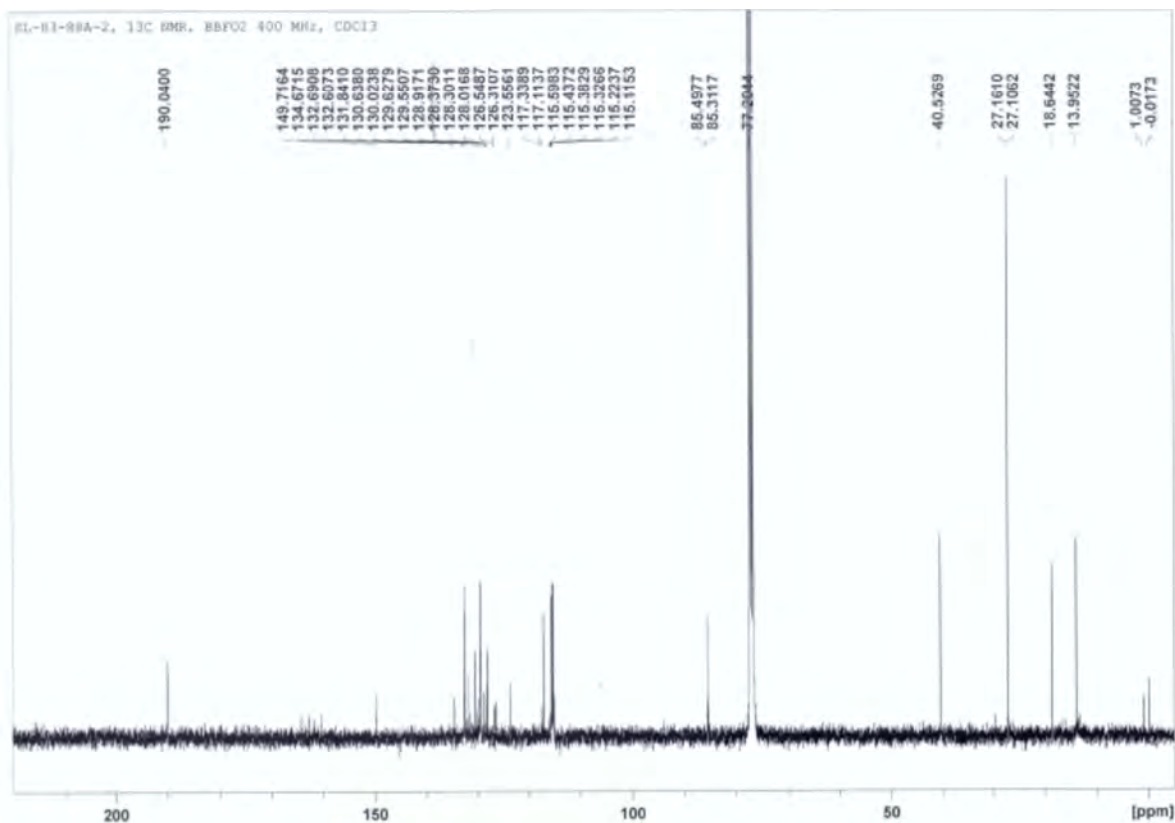



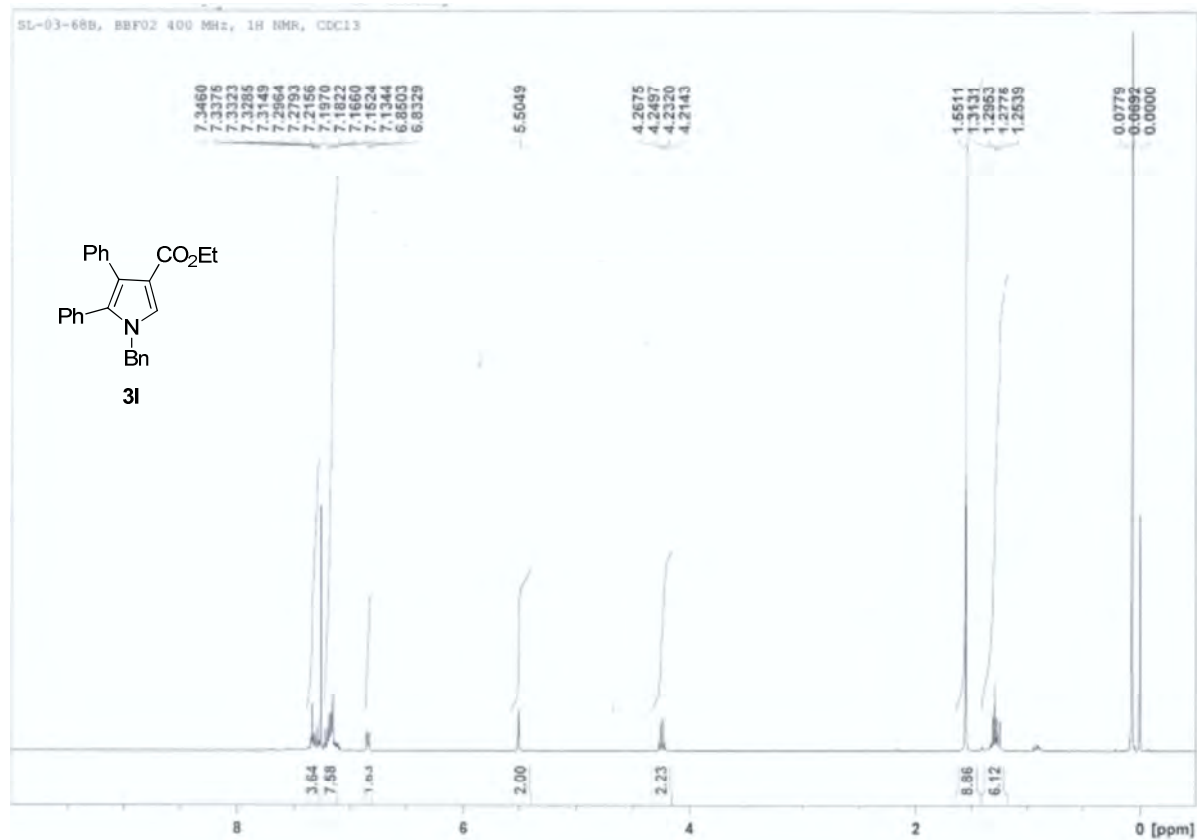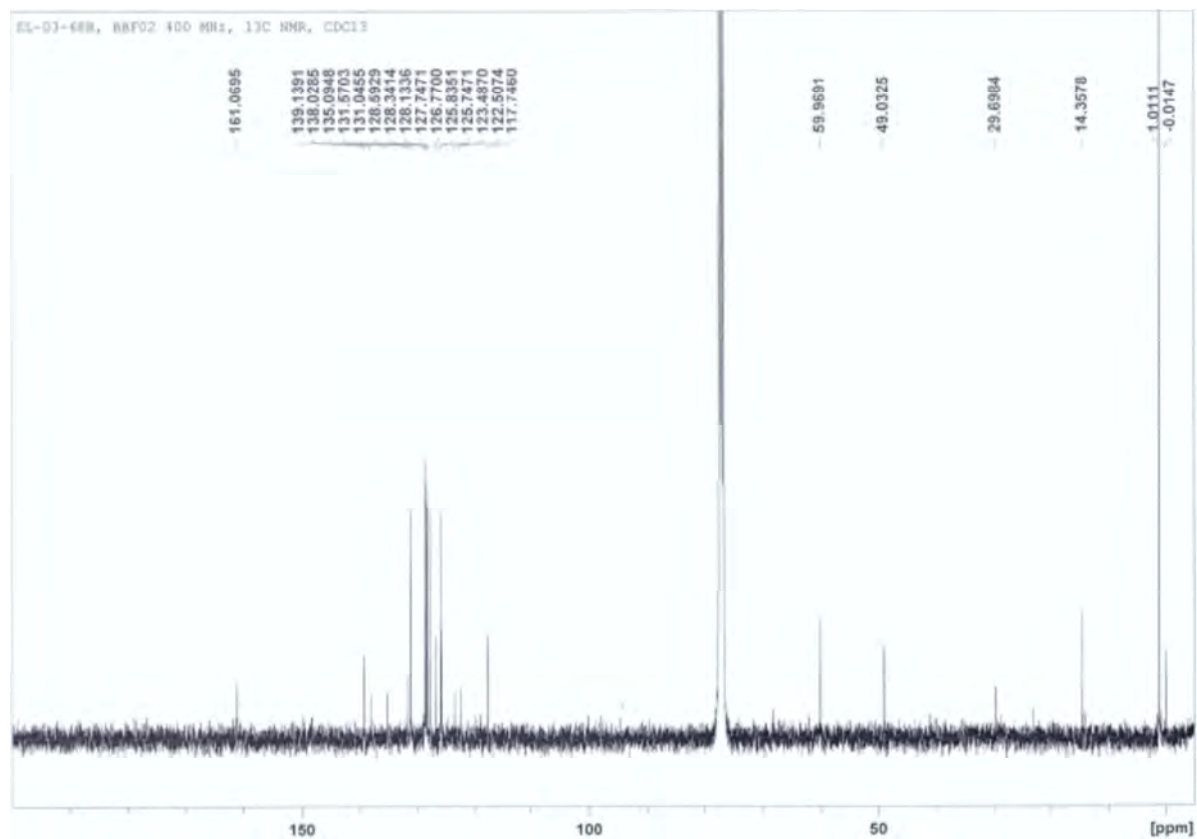

Table 1. Crystal data and structure refinement for Compound S1f.

|                                   |                                                                 |                 |
|-----------------------------------|-----------------------------------------------------------------|-----------------|
| Identification code               | Compound S1f                                                    |                 |
| Empirical formula                 | C <sub>24</sub> H <sub>23</sub> F <sub>2</sub> N O <sub>4</sub> |                 |
| Formula weight                    | 427.43                                                          |                 |
| Temperature                       | 103(2) K                                                        |                 |
| Wavelength                        | 0.71073 Å                                                       |                 |
| Crystal system                    | Monoclinic                                                      |                 |
| Space group                       | P2/c                                                            |                 |
| Unit cell dimensions              | a = 14.9219(4) Å                                                | α = 90°.        |
|                                   | b = 6.4133(2) Å                                                 | β = 98.979(2)°. |
|                                   | c = 22.9718(7) Å                                                | γ = 90°.        |
| Volume                            | 2171.43(11) Å <sup>3</sup>                                      |                 |
| Z                                 | 4                                                               |                 |
| Density (calculated)              | 1.307 Mg/m <sup>3</sup>                                         |                 |
| Absorption coefficient            | 0.100 mm <sup>-1</sup>                                          |                 |
| F(000)                            | 896                                                             |                 |
| Crystal size                      | 0.40 x 0.38 x 0.38 mm <sup>3</sup>                              |                 |
| Theta range for data collection   | 2.09 to 26.37°.                                                 |                 |
| Index ranges                      | -18 ≤ h ≤ 18, -8 ≤ k ≤ 8, -28 ≤ l ≤ 28                          |                 |
| Reflections collected             | 15786                                                           |                 |
| Independent reflections           | 4423 [R(int) = 0.0310]                                          |                 |
| Completeness to theta = 26.37°    | 99.8 %                                                          |                 |
| Absorption correction             | Semi-empirical from equivalents                                 |                 |
| Max. and min. transmission        | 0.9630 and 0.9611                                               |                 |
| Refinement method                 | Full-matrix least-squares on F <sup>2</sup>                     |                 |
| Data / restraints / parameters    | 4423 / 13 / 284                                                 |                 |
| Goodness-of-fit on F <sup>2</sup> | 1.052                                                           |                 |
| Final R indices [I > 2σ(I)]       | R1 = 0.0526, wR2 = 0.1553                                       |                 |
| R indices (all data)              | R1 = 0.0642, wR2 = 0.1675                                       |                 |
| Largest diff. peak and hole       | 0.430 and -0.704 e.Å <sup>-3</sup>                              |                 |

Table 1. Crystal data and structure refinement for Compound 3c.

|                                   |                                             |          |  |
|-----------------------------------|---------------------------------------------|----------|--|
| Identification code               | Compound 3c                                 |          |  |
| Empirical formula                 | C15 H12.66 F0.34 N O                        |          |  |
| Formula weight                    | 229.34                                      |          |  |
| Temperature                       | 103(2) K                                    |          |  |
| Wavelength                        | 0.71073 Å                                   |          |  |
| Crystal system                    | Orthorhombic                                |          |  |
| Space group                       | Pbcn                                        |          |  |
| Unit cell dimensions              | a = 21.3178(15) Å                           | α= 90°.  |  |
|                                   | b = 7.5336(6) Å                             | β= 90°.  |  |
|                                   | c = 7.2988(4) Å                             | γ = 90°. |  |
| Volume                            | 1172.19(14) Å <sup>3</sup>                  |          |  |
| Z                                 | 4                                           |          |  |
| Density (calculated)              | 1.300 Mg/m <sup>3</sup>                     |          |  |
| Absorption coefficient            | 0.085 mm <sup>-1</sup>                      |          |  |
| F(000)                            | 483                                         |          |  |
| Crystal size                      | 0.40 x 0.40 x 0.36 mm <sup>3</sup>          |          |  |
| Theta range for data collection   | 1.91 to 31.03°.                             |          |  |
| Index ranges                      | -30<=h<=30, -10<=k<=10, -10<=l<=10          |          |  |
| Reflections collected             | 21637                                       |          |  |
| Independent reflections           | 1876 [R(int) = 0.0451]                      |          |  |
| Completeness to theta = 31.03°    | 99.5 %                                      |          |  |
| Absorption correction             | Semi-empirical from equivalents             |          |  |
| Max. and min. transmission        | 0.9700 and 0.9667                           |          |  |
| Refinement method                 | Full-matrix least-squares on F <sup>2</sup> |          |  |
| Data / restraints / parameters    | 1876 / 267 / 140                            |          |  |
| Goodness-of-fit on F <sup>2</sup> | 1.212                                       |          |  |
| Final R indices [I>2sigma(I)]     | R1 = 0.0459, wR2 = 0.1425                   |          |  |
| R indices (all data)              | R1 = 0.0695, wR2 = 0.1672                   |          |  |
| Largest diff. peak and hole       | 0.269 and -0.261 e.Å <sup>-3</sup>          |          |  |
